# Supplementary material
Source: publisher figshare collection journal article supplement (https://gsajournals.figshare.com/ndownloader/files/14675399)
Supplement: Supplementary file 1 [file 14675399]

## Sheet: #9
frame	time	PC	TB	ant isth	mid isth	post isth
1050	00:00:41.456000
1051	00:00:41.495000
1052	00:00:41.535000
1053	00:00:41.575000
1054	00:00:41.614000
1055	00:00:41.654000
1056	00:00:41.693000
1057	00:00:41.733000
1058	00:00:41.772000
1059	00:00:41.812000
1060	00:00:41.851000
1061	00:00:41.891000
1062	00:00:41.930000
1063	00:00:41.970000
1064	00:00:42.009000
1065	00:00:42.049000
1066	00:00:42.088000
1067	00:00:42.128000
1068	00:00:42.167000
1069	00:00:42.207000
1070	00:00:42.246000
1071	00:00:42.286000
1072	00:00:42.325000
1073	00:00:42.365000
1074	00:00:42.404000
1075	00:00:42.444000
1076	00:00:42.483000
1077	00:00:42.523000
1078	00:00:42.562000
1079	00:00:42.602000
1080	00:00:42.641000
1081	00:00:42.681000
1082	00:00:42.720000
1083	00:00:42.760000
1084	00:00:42.799000
1085	00:00:42.839000
1086	00:00:42.878000
1087	00:00:42.918000
1088	00:00:42.957000
1089	00:00:42.997000
1090	00:00:43.036000
1091	00:00:43.076000
1092	00:00:43.116000
1093	00:00:43.155000
1094	00:00:43.195000
1095	00:00:43.234000
1096	00:00:43.274000
1097	00:00:43.313000
1098	00:00:43.353000
1099	00:00:43.392000
1100	00:00:43.432000
1101	00:00:43.471000
1102	00:00:43.511000
1103	00:00:43.550000
1104	00:00:43.590000
1105	00:00:43.629000
1106	00:00:43.670000
1107	00:00:43.709000
1108	00:00:43.749000
1109	00:00:43.788000
1110	00:00:43.828000
1111	00:00:43.867000
1112	00:00:43.907000
1113	00:00:43.946000
1114	00:00:43.986000
1115	00:00:44.025000
1116	00:00:44.065000
1117	00:00:44.104000
1118	00:00:44.144000
1119	00:00:44.183000
1120	00:00:44.223000
1121	00:00:44.262000
1122	00:00:44.302000
1123	00:00:44.341000
1124	00:00:44.381000
1125	00:00:44.420000
1126	00:00:44.460000
1127	00:00:44.499000
1128	00:00:44.539000
1129	00:00:44.579000
1130	00:00:44.618000
1131	00:00:44.658000
1132	00:00:44.697000
1133	00:00:44.737000
1134	00:00:44.776000
1135	00:00:44.815000
1136	00:00:44.855000
1137	00:00:44.895000
1138	00:00:44.934000
1139	00:00:44.974000
1140	00:00:45.013000
1141	00:00:45.053000
1142	00:00:45.092000
1143	00:00:45.132000
1144	00:00:45.171000
1145	00:00:45.211000
1146	00:00:45.250000
1147	00:00:45.290000
1148	00:00:45.329000
1149	00:00:45.369000
1150	00:00:45.408000
1151	00:00:45.448000
1152	00:00:45.487000
1153	00:00:45.527000
1154	00:00:45.566000
1155	00:00:45.606000
1156	00:00:45.645000
1157	00:00:45.685000
1158	00:00:45.724000
1159	00:00:45.764000
1160	00:00:45.803000
1161	00:00:45.843000
1162	00:00:45.882000
1163	00:00:45.922000
1164	00:00:45.961000
1165	00:00:46.001000
1166	00:00:46.040000
1167	00:00:46.080000
1168	00:00:46.119000
1169	00:00:46.159000
1170	00:00:46.198000
1171	00:00:46.238000
1172	00:00:46.277000
1173	00:00:46.317000
1174	00:00:46.356000
1175	00:00:46.396000
1176	00:00:46.436000
1177	00:00:46.475000
1178	00:00:46.515000
1179	00:00:46.554000
1180	00:00:46.594000
1181	00:00:46.633000
1182	00:00:46.673000
1183	00:00:46.712000
1184	00:00:46.752000
1185	00:00:46.791000
1186	00:00:46.831000
1187	00:00:46.870000
1188	00:00:46.910000
1189	00:00:46.949000
1190	00:00:46.989000
1191	00:00:47.028000
1192	00:00:47.068000
1193	00:00:47.107000
1194	00:00:47.147000
1195	00:00:47.186000
1196	00:00:47.226000
1197	00:00:47.265000
1198	00:00:47.305000
1199	00:00:47.344000
1200	00:00:47.384000
1201	00:00:47.423000
1202	00:00:47.463000
1203	00:00:47.502000
1204	00:00:47.542000
1205	00:00:47.581000
1206	00:00:47.621000
1207	00:00:47.660000
1208	00:00:47.700000
1209	00:00:47.739000
1210	00:00:47.779000
1211	00:00:47.818000
1212	00:00:47.858000
1213	00:00:47.898000
1214	00:00:47.937000
1215	00:00:47.977000
1216	00:00:48.016000
1217	00:00:48.056000
1218	00:00:48.095000
1219	00:00:48.135000
1220	00:00:48.174000
1221	00:00:48.214000
1222	00:00:48.253000
1223	00:00:48.293000
1224	00:00:48.332000
1225	00:00:48.372000
1226	00:00:48.411000
1227	00:00:48.451000
1228	00:00:48.490000
1229	00:00:48.530000
1230	00:00:48.569000
1231	00:00:48.609000
1232	00:00:48.648000
1233	00:00:48.688000
1234	00:00:48.727000
1235	00:00:48.767000
1236	00:00:48.806000
1237	00:00:48.846000
1238	00:00:48.885000
1239	00:00:48.925000
1240	00:00:48.964000
1241	00:00:49.004000
1242	00:00:49.043000
1243	00:00:49.083000
1244	00:00:49.122000
1245	00:00:49.162000
1246	00:00:49.201000
1247	00:00:49.241000
1248	00:00:49.280000
1249	00:00:49.320000
1250	00:00:49.359000
1251	00:00:49.399000
1252	00:00:49.439000
1253	00:00:49.478000
1254	00:00:49.518000
1255	00:00:49.557000
1256	00:00:49.597000
1257	00:00:49.636000
1258	00:00:49.675000
1259	00:00:49.715000
1260	00:00:49.755000
1261	00:00:49.794000
1262	00:00:49.834000
1263	00:00:49.873000
1264	00:00:49.913000
1265	00:00:49.952000
1266	00:00:49.992000
1267	00:00:50.031000
1268	00:00:50.071000
1269	00:00:50.110000
1270	00:00:50.150000
1271	00:00:50.189000
1272	00:00:50.229000
1273	00:00:50.268000
1274	00:00:50.308000
1275	00:00:50.347000
1276	00:00:50.387000
1277	00:00:50.426000
1278	00:00:50.466000
1279	00:00:50.505000
1280	00:00:50.545000
1281	00:00:50.584000
1282	00:00:50.624000
1283	00:00:50.663000
1284	00:00:50.703000
1285	00:00:50.742000
1286	00:00:50.782000
1287	00:00:50.821000
1288	00:00:50.861000
1289	00:00:50.900000
1290	00:00:50.940000
1291	00:00:50.979000
1292	00:00:51.019000
1293	00:00:51.058000
1294	00:00:51.098000
1295	00:00:51.137000
1296	00:00:51.177000
1297	00:00:51.216000
1298	00:00:51.256000
1299	00:00:51.296000
1300	00:00:51.335000
1301	00:00:51.375000
1302	00:00:51.414000
1303	00:00:51.454000
1304	00:00:51.493000
1305	00:00:51.533000
1306	00:00:51.572000
1307	00:00:51.612000
1308	00:00:51.651000
1309	00:00:51.691000
1310	00:00:51.730000
1311	00:00:51.770000
1312	00:00:51.809000
1313	00:00:51.849000
1314	00:00:51.888000
1315	00:00:51.928000
1316	00:00:51.967000
1317	00:00:52.007000
1318	00:00:52.046000
1319	00:00:52.086000
1320	00:00:52.125000
1321	00:00:52.165000
1322	00:00:52.204000
1323	00:00:52.244000
1324	00:00:52.283000
1325	00:00:52.323000
1326	00:00:52.362000
1327	00:00:52.402000
1328	00:00:52.441000
1329	00:00:52.481000
1330	00:00:52.520000
1331	00:00:52.560000
1332	00:00:52.599000
1333	00:00:52.639000
1334	00:00:52.678000
1335	00:00:52.718000
1336	00:00:52.758000
1337	00:00:52.797000
1338	00:00:52.837000
1339	00:00:52.876000
1340	00:00:52.916000
1341	00:00:52.955000
1342	00:00:52.995000
1343	00:00:53.034000
1344	00:00:53.074000
1345	00:00:53.113000
1346	00:00:53.153000
1347	00:00:53.192000
1348	00:00:53.232000
1349	00:00:53.271000
1350	00:00:53.311000
1351	00:00:53.350000
1352	00:00:53.390000
1353	00:00:53.429000
1354	00:00:53.469000
1355	00:00:53.508000
1356	00:00:53.548000
1357	00:00:53.587000
1358	00:00:53.627000
1359	00:00:53.667000
1360	00:00:53.707000
1361	00:00:53.746000
1362	00:00:53.786000
1363	00:00:53.825000
1364	00:00:53.865000
1365	00:00:53.904000
1366	00:00:53.944000
1367	00:00:53.983000
1368	00:00:54.023000
1369	00:00:54.062000
1370	00:00:54.102000
1371	00:00:54.141000
1372	00:00:54.181000
1373	00:00:54.220000
1374	00:00:54.260000
1375	00:00:54.300000
1376	00:00:54.339000
1377	00:00:54.379000
1378	00:00:54.418000
1379	00:00:54.458000
1380	00:00:54.497000
1381	00:00:54.536000
1382	00:00:54.576000
1383	00:00:54.616000
1384	00:00:54.655000
1385	00:00:54.695000
1386	00:00:54.734000
1387	00:00:54.774000
1388	00:00:54.813000
1389	00:00:54.853000
1390	00:00:54.892000
1391	00:00:54.932000
1392	00:00:54.971000
1393	00:00:55.011000
1394	00:00:55.050000
1395	00:00:55.090000
1396	00:00:55.129000
1397	00:00:55.169000
1398	00:00:55.208000
1399	00:00:55.248000
1400	00:00:55.287000
1401	00:00:55.327000
1402	00:00:55.366000
1403	00:00:55.406000
1404	00:00:55.445000
1405	00:00:55.485000
1406	00:00:55.524000
1407	00:00:55.564000
1408	00:00:55.603000
1409	00:00:55.643000
1410	00:00:55.682000
1411	00:00:55.722000
1412	00:00:55.761000
1413	00:00:55.801000
1414	00:00:55.840000
1415	00:00:55.880000
1416	00:00:55.919000
1417	00:00:55.959000
1418	00:00:55.998000
1419	00:00:56.038000
1420	00:00:56.078000
1421	00:00:56.117000
1422	00:00:56.157000
1423	00:00:56.196000
1424	00:00:56.236000
1425	00:00:56.275000
1426	00:00:56.315000
1427	00:00:56.354000
1428	00:00:56.394000
1429	00:00:56.433000
1430	00:00:56.473000
1431	00:00:56.512000
1432	00:00:56.552000
1433	00:00:56.591000
1434	00:00:56.631000
1435	00:00:56.670000
1436	00:00:56.710000
1437	00:00:56.749000
1438	00:00:56.789000
1439	00:00:56.828000
1440	00:00:56.868000
1441	00:00:56.907000
1442	00:00:56.947000
1443	00:00:56.986000
1444	00:00:57.026000
1445	00:00:57.065000
1446	00:00:57.105000
1447	00:00:57.144000
1448	00:00:57.184000
1449	00:00:57.223000
1450	00:00:57.263000
1451	00:00:57.302000
1452	00:00:57.342000
1453	00:00:57.381000
1454	00:00:57.421000
1455	00:00:57.460000
1456	00:00:57.500000
1457	00:00:57.539000
1458	00:00:57.579000
1459	00:00:57.619000
1460	00:00:57.658000
1461	00:00:57.698000
1462	00:00:57.737000
1463	00:00:57.777000
1464	00:00:57.816000
1465	00:00:57.856000
1466	00:00:57.895000
1467	00:00:57.935000
1468	00:00:57.974000
1469	00:00:58.014000
1470	00:00:58.053000
1471	00:00:58.093000
1472	00:00:58.132000
1473	00:00:58.172000
1474	00:00:58.211000
1475	00:00:58.251000
1476	00:00:58.290000
1477	00:00:58.330000
1478	00:00:58.369000
1479	00:00:58.409000
1480	00:00:58.448000
1481	00:00:58.488000
1482	00:00:58.527000
1483	00:00:58.567000
1484	00:00:58.606000
1485	00:00:58.646000
1486	00:00:58.685000
1487	00:00:58.725000
1488	00:00:58.764000
1489	00:00:58.804000
1490	00:00:58.843000
1491	00:00:58.883000
1492	00:00:58.922000
1493	00:00:58.962000
1494	00:00:59.001000
1495	00:00:59.041000
1496	00:00:59.080000
1497	00:00:59.120000
1498	00:00:59.160000
1499	00:00:59.199000
1500	00:00:59.239000
1501	00:00:59.278000
1502	00:00:59.317000
1503	00:00:59.357000
1504	00:00:59.397000
1505	00:00:59.436000
1506	00:00:59.476000
1507	00:00:59.515000
1508	00:00:59.555000
1509	00:00:59.594000
1510	00:00:59.634000
1511	00:00:59.673000
1512	00:00:59.713000
1513	00:00:59.752000
1514	00:00:59.792000
1515	00:00:59.831000
1516	00:00:59.871000
1517	00:00:59.910000
1518	00:00:59.950000
1519	00:00:59.989000
1520	00:01:00.029000
1521	00:01:00.068000
1522	00:01:00.108000
1523	00:01:00.147000
1524	00:01:00.187000
1525	00:01:00.226000
1526	00:01:00.266000
1527	00:01:00.305000
1528	00:01:00.345000
1529	00:01:00.384000
1530	00:01:00.424000
1531	00:01:00.463000
1532	00:01:00.503000
1533	00:01:00.542000
1534	00:01:00.582000
1535	00:01:00.622000
1536	00:01:00.661000
1537	00:01:00.700000
1538	00:01:00.740000
1539	00:01:00.779000
1540	00:01:00.819000
1541	00:01:00.858000
1542	00:01:00.898000
1543	00:01:00.938000
1544	00:01:00.977000
1545	00:01:01.017000
1546	00:01:01.056000
1547	00:01:01.096000
1548	00:01:01.135000
1549	00:01:01.175000
1550	00:01:01.214000
1551	00:01:01.254000
1552	00:01:01.293000
1553	00:01:01.333000
1554	00:01:01.372000
1555	00:01:01.412000
1556	00:01:01.451000
1557	00:01:01.491000
1558	00:01:01.530000
1559	00:01:01.570000
1560	00:01:01.609000
1561	00:01:01.649000
1562	00:01:01.688000
1563	00:01:01.728000
1564	00:01:01.767000
1565	00:01:01.807000
1566	00:01:01.846000
1567	00:01:01.886000
1568	00:01:01.925000
1569	00:01:01.965000
1570	00:01:02.004000
1571	00:01:02.044000
1572	00:01:02.083000
1573	00:01:02.123000
1574	00:01:02.162000
1575	00:01:02.202000
1576	00:01:02.241000
1577	00:01:02.281000
1578	00:01:02.320000
1579	00:01:02.360000
1580	00:01:02.399000
1581	00:01:02.439000
1582	00:01:02.479000
1583	00:01:02.518000
1584	00:01:02.558000
1585	00:01:02.597000
1586	00:01:02.637000
1587	00:01:02.676000
1588	00:01:02.716000
1589	00:01:02.755000
1590	00:01:02.795000
1591	00:01:02.834000
1592	00:01:02.874000
1593	00:01:02.913000
1594	00:01:02.953000
1595	00:01:02.992000
1596	00:01:03.032000
1597	00:01:03.071000
1598	00:01:03.111000
1599	00:01:03.150000
1600	00:01:03.190000
1601	00:01:03.229000
1602	00:01:03.269000
1603	00:01:03.308000
1604	00:01:03.348000
1605	00:01:03.387000
1606	00:01:03.427000
1607	00:01:03.466000
1608	00:01:03.506000
1609	00:01:03.545000
1610	00:01:03.585000
1611	00:01:03.624000
1612	00:01:03.665000
1613	00:01:03.704000
1614	00:01:03.744000
1615	00:01:03.783000
1616	00:01:03.823000
1617	00:01:03.862000
1618	00:01:03.902000
1619	00:01:03.942000
1620	00:01:03.981000
1621	00:01:04.021000
1622	00:01:04.060000
1623	00:01:04.100000
1624	00:01:04.139000
1625	00:01:04.178000
1626	00:01:04.218000
1627	00:01:04.258000
1628	00:01:04.297000
1629	00:01:04.337000
1630	00:01:04.376000
1631	00:01:04.416000
1632	00:01:04.455000
1633	00:01:04.495000
1634	00:01:04.534000
1635	00:01:04.574000
1636	00:01:04.613000
1637	00:01:04.653000
1638	00:01:04.692000
1639	00:01:04.732000
1640	00:01:04.771000
1641	00:01:04.811000
1642	00:01:04.850000
1643	00:01:04.890000
1644	00:01:04.929000
1645	00:01:04.969000
1646	00:01:05.008000
1647	00:01:05.048000
1648	00:01:05.087000
1649	00:01:05.127000
1650	00:01:05.166000
1651	00:01:05.206000
1652	00:01:05.245000
1653	00:01:05.285000
1654	00:01:05.324000
1655	00:01:05.364000
1656	00:01:05.403000
1657	00:01:05.443000
1658	00:01:05.482000
1659	00:01:05.522000
1660	00:01:05.561000
1661	00:01:05.601000
1662	00:01:05.640000
1663	00:01:05.680000
1664	00:01:05.719000
1665	00:01:05.759000
1666	00:01:05.799000
1667	00:01:05.838000
1668	00:01:05.878000
1669	00:01:05.917000
1670	00:01:05.957000
1671	00:01:05.996000
1672	00:01:06.036000
1673	00:01:06.075000
1674	00:01:06.115000
1675	00:01:06.154000
1676	00:01:06.194000
1677	00:01:06.233000
1678	00:01:06.273000
1679	00:01:06.312000
1680	00:01:06.352000
1681	00:01:06.391000
1682	00:01:06.431000
1683	00:01:06.470000
1684	00:01:06.510000
1685	00:01:06.549000
1686	00:01:06.589000
1687	00:01:06.628000
1688	00:01:06.668000
1689	00:01:06.707000
1690	00:01:06.747000
1691	00:01:06.786000
1692	00:01:06.826000
1693	00:01:06.865000
1694	00:01:06.905000
1695	00:01:06.944000
1696	00:01:06.984000
1697	00:01:07.023000
1698	00:01:07.063000
1699	00:01:07.102000
1700	00:01:07.142000
1701	00:01:07.181000
1702	00:01:07.221000
1703	00:01:07.260000
1704	00:01:07.300000
1705	00:01:07.340000
1706	00:01:07.379000
1707	00:01:07.419000
1708	00:01:07.458000
1709	00:01:07.498000
1710	00:01:07.537000
1711	00:01:07.577000
1712	00:01:07.616000
1713	00:01:07.656000
1714	00:01:07.695000
1715	00:01:07.735000
1716	00:01:07.774000
1717	00:01:07.814000
1718	00:01:07.853000
1719	00:01:07.893000
1720	00:01:07.932000
1721	00:01:07.972000
1722	00:01:08.011000
1723	00:01:08.051000
1724	00:01:08.090000
1725	00:01:08.130000
1726	00:01:08.169000
1727	00:01:08.209000
1728	00:01:08.248000
1729	00:01:08.288000
1730	00:01:08.327000
1731	00:01:08.367000
1732	00:01:08.406000
1733	00:01:08.446000
1734	00:01:08.485000
1735	00:01:08.525000
1736	00:01:08.564000
1737	00:01:08.604000
1738	00:01:08.643000
1739	00:01:08.683000
1740	00:01:08.722000
1741	00:01:08.762000
1742	00:01:08.802000
1743	00:01:08.841000
1744	00:01:08.881000
1745	00:01:08.920000
1746	00:01:08.960000
1747	00:01:08.999000
1748	00:01:09.039000
1749	00:01:09.078000
1750	00:01:09.118000
1751	00:01:09.157000
1752	00:01:09.197000
1753	00:01:09.236000
1754	00:01:09.276000
1755	00:01:09.315000
1756	00:01:09.355000
1757	00:01:09.394000
1758	00:01:09.434000
1759	00:01:09.473000
1760	00:01:09.513000
1761	00:01:09.552000
1762	00:01:09.592000
1763	00:01:09.631000
1764	00:01:09.671000
1765	00:01:09.710000
1766	00:01:09.750000
1767	00:01:09.789000
1768	00:01:09.829000
1769	00:01:09.868000
1770	00:01:09.908000
1771	00:01:09.947000
1772	00:01:09.987000
1773	00:01:10.026000
1774	00:01:10.066000
1775	00:01:10.105000
1776	00:01:10.145000
1777	00:01:10.184000
1778	00:01:10.224000
1779	00:01:10.263000
1780	00:01:10.303000
1781	00:01:10.342000
1782	00:01:10.382000
1783	00:01:10.421000
1784	00:01:10.461000
1785	00:01:10.500000
1786	00:01:10.540000
1787	00:01:10.579000
1788	00:01:10.619000
1789	00:01:10.659000
1790	00:01:10.698000
1791	00:01:10.738000
1792	00:01:10.777000
1793	00:01:10.817000
1794	00:01:10.856000
1795	00:01:10.896000
1796	00:01:10.935000
1797	00:01:10.975000
1798	00:01:11.014000
1799	00:01:11.054000
1800	00:01:11.093000
1801	00:01:11.133000
1802	00:01:11.172000
1803	00:01:11.212000
1804	00:01:11.251000
1805	00:01:11.291000
1806	00:01:11.330000
1807	00:01:11.370000
1808	00:01:11.409000
1809	00:01:11.449000
1810	00:01:11.488000
1811	00:01:11.528000
1812	00:01:11.567000
1813	00:01:11.607000
1814	00:01:11.646000
1815	00:01:11.686000
1816	00:01:11.725000
1817	00:01:11.765000
1818	00:01:11.804000
1819	00:01:11.844000
1820	00:01:11.883000
1821	00:01:11.923000
1822	00:01:11.962000
1823	00:01:12.002000
1824	00:01:12.041000
1825	00:01:12.081000
1826	00:01:12.121000
1827	00:01:12.160000
1828	00:01:12.200000
1829	00:01:12.239000
1830	00:01:12.279000
1831	00:01:12.318000
1832	00:01:12.358000
1833	00:01:12.397000
1834	00:01:12.437000
1835	00:01:12.476000
1836	00:01:12.516000
1837	00:01:12.555000
1838	00:01:12.595000
1839	00:01:12.634000
1840	00:01:12.674000
1841	00:01:12.713000
1842	00:01:12.753000
1843	00:01:12.792000
1844	00:01:12.832000
1845	00:01:12.871000
1846	00:01:12.911000
1847	00:01:12.950000
1848	00:01:12.990000
1849	00:01:13.029000
1850	00:01:13.069000
1851	00:01:13.108000
1852	00:01:13.148000
1853	00:01:13.187000
1854	00:01:13.227000
1855	00:01:13.266000
1856	00:01:13.306000
1857	00:01:13.345000
1858	00:01:13.385000
1859	00:01:13.424000
1860	00:01:13.464000
1861	00:01:13.503000
1862	00:01:13.543000
1863	00:01:13.582000
1864	00:01:13.622000
1865	00:01:13.663000
1866	00:01:13.702000
1867	00:01:13.742000
1868	00:01:13.781000
1869	00:01:13.821000
1870	00:01:13.860000
1871	00:01:13.900000
1872	00:01:13.939000
1873	00:01:13.979000
1874	00:01:14.018000
1875	00:01:14.058000
1876	00:01:14.097000
1877	00:01:14.137000
1878	00:01:14.176000
1879	00:01:14.216000
1880	00:01:14.255000
1881	00:01:14.295000
1882	00:01:14.334000
1883	00:01:14.374000
1884	00:01:14.413000
1885	00:01:14.453000
1886	00:01:14.492000
1887	00:01:14.532000
1888	00:01:14.571000
1889	00:01:14.611000
1890	00:01:14.650000
1891	00:01:14.690000
1892	00:01:14.729000
1893	00:01:14.769000
1894	00:01:14.808000
1895	00:01:14.848000
1896	00:01:14.887000
1897	00:01:14.927000
1898	00:01:14.966000
1899	00:01:15.006000
1900	00:01:15.045000
1901	00:01:15.085000
1902	00:01:15.124000
1903	00:01:15.164000
1904	00:01:15.203000
1905	00:01:15.243000
1906	00:01:15.282000
1907	00:01:15.322000
1908	00:01:15.361000
1909	00:01:15.401000
1910	00:01:15.441000
1911	00:01:15.480000
1912	00:01:15.520000
1913	00:01:15.559000
1914	00:01:15.599000
1915	00:01:15.638000
1916	00:01:15.678000
1917	00:01:15.717000
1918	00:01:15.757000
1919	00:01:15.796000
1920	00:01:15.836000
1921	00:01:15.875000
1922	00:01:15.915000
1923	00:01:15.954000
1924	00:01:15.994000
1925	00:01:16.033000
1926	00:01:16.073000
1927	00:01:16.112000
1928	00:01:16.152000
1929	00:01:16.191000
1930	00:01:16.231000
1931	00:01:16.270000
1932	00:01:16.310000
1933	00:01:16.349000
1934	00:01:16.389000
1935	00:01:16.428000
1936	00:01:16.468000
1937	00:01:16.507000
1938	00:01:16.547000
1939	00:01:16.586000
1940	00:01:16.626000
1941	00:01:16.665000
1942	00:01:16.705000
1943	00:01:16.744000
1944	00:01:16.784000
1945	00:01:16.823000
1946	00:01:16.863000
1947	00:01:16.902000
1948	00:01:16.942000
1949	00:01:16.982000
1950	00:01:17.021000
1951	00:01:17.061000
1952	00:01:17.100000
1953	00:01:17.140000
1954	00:01:17.179000
1955	00:01:17.219000
1956	00:01:17.258000
1957	00:01:17.298000
1958	00:01:17.337000
1959	00:01:17.377000
1960	00:01:17.416000
1961	00:01:17.456000
1962	00:01:17.495000
1963	00:01:17.535000
1964	00:01:17.574000
1965	00:01:17.614000
1966	00:01:17.653000
1967	00:01:17.693000
1968	00:01:17.732000
1969	00:01:17.772000
1970	00:01:17.811000
1971	00:01:17.851000
1972	00:01:17.890000
1973	00:01:17.930000
1974	00:01:17.969000
1975	00:01:18.009000
1976	00:01:18.048000
1977	00:01:18.088000
1978	00:01:18.127000
1979	00:01:18.167000
1980	00:01:18.206000
1981	00:01:18.246000
1982	00:01:18.285000
1983	00:01:18.325000
1984	00:01:18.364000
1985	00:01:18.404000
1986	00:01:18.443000
1987	00:01:18.483000
1988	00:01:18.523000
1989	00:01:18.562000
1990	00:01:18.602000
1991	00:01:18.641000
1992	00:01:18.681000
1993	00:01:18.720000
1994	00:01:18.760000
1995	00:01:18.799000
1996	00:01:18.839000
1997	00:01:18.878000
1998	00:01:18.918000
1999	00:01:18.957000
2000	00:01:18.997000
2001	00:01:19.036000
2002	00:01:19.076000
2003	00:01:19.115000
2004	00:01:19.155000
2005	00:01:19.194000
2006	00:01:19.234000
2007	00:01:19.273000
2008	00:01:19.313000
2009	00:01:19.352000
2010	00:01:19.392000
2011	00:01:19.431000
2012	00:01:19.471000
2013	00:01:19.510000
2014	00:01:19.550000
2015	00:01:19.589000

## Sheet: #8
frame	time	PC	TB	ant isth	mid isth	post isth
161	00:00:06.323000
162	00:00:06.363000
163	00:00:06.402000
164	00:00:06.442000
165	00:00:06.482000
166	00:00:06.521000
167	00:00:06.560000
168	00:00:06.600000
169	00:00:06.639000
170	00:00:06.679000
171	00:00:06.719000
172	00:00:06.758000
173	00:00:06.798000
174	00:00:06.837000
175	00:00:06.877000
176	00:00:06.916000
177	00:00:06.956000
178	00:00:06.995000
179	00:00:07.035000
180	00:00:07.074000
181	00:00:07.114000
182	00:00:07.153000
183	00:00:07.193000
184	00:00:07.232000
185	00:00:07.272000
186	00:00:07.311000
187	00:00:07.351000
188	00:00:07.390000
189	00:00:07.430000
190	00:00:07.469000
191	00:00:07.509000
192	00:00:07.548000
193	00:00:07.588000
194	00:00:07.627000
195	00:00:07.667000
196	00:00:07.706000
197	00:00:07.746000
198	00:00:07.785000
199	00:00:07.825000
200	00:00:07.864000
201	00:00:07.904000
202	00:00:07.943000
203	00:00:07.983000
204	00:00:08.022000
205	00:00:08.062000
206	00:00:08.101000
207	00:00:08.141000
208	00:00:08.180000
209	00:00:08.220000
210	00:00:08.259000
211	00:00:08.299000
212	00:00:08.339000
213	00:00:08.378000
214	00:00:08.418000
215	00:00:08.457000
216	00:00:08.497000
217	00:00:08.536000
218	00:00:08.576000
219	00:00:08.615000
220	00:00:08.655000
221	00:00:08.694000
222	00:00:08.734000
223	00:00:08.773000
224	00:00:08.813000
225	00:00:08.852000
226	00:00:08.892000
227	00:00:08.931000
228	00:00:08.971000
229	00:00:09.010000
230	00:00:09.050000
231	00:00:09.089000
232	00:00:09.129000
233	00:00:09.168000
234	00:00:09.208000
235	00:00:09.247000
236	00:00:09.287000
237	00:00:09.326000
238	00:00:09.366000
239	00:00:09.405000
240	00:00:09.445000
241	00:00:09.484000
242	00:00:09.524000
243	00:00:09.563000
244	00:00:09.603000
245	00:00:09.642000
246	00:00:09.682000
247	00:00:09.721000
248	00:00:09.761000
249	00:00:09.801000
250	00:00:09.840000
251	00:00:09.880000
252	00:00:09.919000
253	00:00:09.959000
254	00:00:09.998000
255	00:00:10.038000
256	00:00:10.077000
257	00:00:10.117000
258	00:00:10.156000
259	00:00:10.196000
260	00:00:10.235000
261	00:00:10.275000
262	00:00:10.314000
263	00:00:10.354000
264	00:00:10.393000
265	00:00:10.433000
266	00:00:10.472000
267	00:00:10.512000
268	00:00:10.551000
269	00:00:10.591000
270	00:00:10.630000
271	00:00:10.670000
272	00:00:10.709000
273	00:00:10.749000
274	00:00:10.788000
275	00:00:10.828000
276	00:00:10.867000
277	00:00:10.907000
278	00:00:10.946000
279	00:00:10.986000
280	00:00:11.025000
281	00:00:11.065000
282	00:00:11.104000
283	00:00:11.144000
284	00:00:11.183000
285	00:00:11.223000
286	00:00:11.262000
287	00:00:11.302000
288	00:00:11.342000
289	00:00:11.381000
290	00:00:11.420000
291	00:00:11.460000
292	00:00:11.499000
293	00:00:11.539000
294	00:00:11.578000
295	00:00:11.618000
296	00:00:11.658000
297	00:00:11.697000
298	00:00:11.737000
299	00:00:11.776000
300	00:00:11.816000
301	00:00:11.855000
302	00:00:11.895000
303	00:00:11.934000
304	00:00:11.974000
305	00:00:12.013000
306	00:00:12.053000
307	00:00:12.092000
308	00:00:12.132000
309	00:00:12.171000
310	00:00:12.211000
311	00:00:12.250000
312	00:00:12.290000
313	00:00:12.329000
314	00:00:12.369000
315	00:00:12.408000
316	00:00:12.448000
317	00:00:12.487000
318	00:00:12.527000
319	00:00:12.566000
320	00:00:12.606000
321	00:00:12.645000
322	00:00:12.685000
323	00:00:12.724000
324	00:00:12.764000
325	00:00:12.803000
326	00:00:12.843000
327	00:00:12.882000
328	00:00:12.922000
329	00:00:12.961000
330	00:00:13.001000
331	00:00:13.040000
332	00:00:13.080000
333	00:00:13.120000
334	00:00:13.159000
335	00:00:13.199000
336	00:00:13.238000
337	00:00:13.278000
338	00:00:13.317000
339	00:00:13.357000
340	00:00:13.396000
341	00:00:13.436000
342	00:00:13.475000
343	00:00:13.515000
344	00:00:13.554000
345	00:00:13.594000
346	00:00:13.633000
347	00:00:13.673000
348	00:00:13.712000
349	00:00:13.752000
350	00:00:13.791000
351	00:00:13.831000
352	00:00:13.870000
353	00:00:13.910000
354	00:00:13.949000
355	00:00:13.989000
356	00:00:14.028000
357	00:00:14.068000
358	00:00:14.107000
359	00:00:14.147000
360	00:00:14.186000
361	00:00:14.226000
362	00:00:14.265000
363	00:00:14.305000
364	00:00:14.344000
365	00:00:14.384000
366	00:00:14.423000
367	00:00:14.463000
368	00:00:14.502000
369	00:00:14.542000
370	00:00:14.581000
371	00:00:14.621000
372	00:00:14.661000
373	00:00:14.700000
374	00:00:14.740000
375	00:00:14.779000
376	00:00:14.819000
377	00:00:14.858000
378	00:00:14.898000
379	00:00:14.937000
380	00:00:14.977000
381	00:00:15.016000
382	00:00:15.056000
383	00:00:15.095000
384	00:00:15.135000
385	00:00:15.174000
386	00:00:15.214000
387	00:00:15.253000
388	00:00:15.293000
389	00:00:15.332000
390	00:00:15.372000
391	00:00:15.411000
392	00:00:15.451000
393	00:00:15.491000
394	00:00:15.531000
395	00:00:15.570000
396	00:00:15.610000
397	00:00:15.649000
398	00:00:15.689000
399	00:00:15.728000
400	00:00:15.768000
401	00:00:15.807000
402	00:00:15.847000
403	00:00:15.886000
404	00:00:15.926000
405	00:00:15.965000
406	00:00:16.005000
407	00:00:16.044000
408	00:00:16.084000
409	00:00:16.123000
410	00:00:16.163000
411	00:00:16.203000
412	00:00:16.242000
413	00:00:16.282000
414	00:00:16.321000
415	00:00:16.360000
416	00:00:16.400000
417	00:00:16.439000
418	00:00:16.479000
419	00:00:16.519000
420	00:00:16.558000
421	00:00:16.598000
422	00:00:16.637000
423	00:00:16.677000
424	00:00:16.716000
425	00:00:16.756000
426	00:00:16.795000
427	00:00:16.835000
428	00:00:16.874000
429	00:00:16.914000
430	00:00:16.953000
431	00:00:16.993000
432	00:00:17.032000
433	00:00:17.072000
434	00:00:17.111000
435	00:00:17.151000
436	00:00:17.190000
437	00:00:17.230000
438	00:00:17.269000
439	00:00:17.309000
440	00:00:17.348000
441	00:00:17.388000
442	00:00:17.427000
443	00:00:17.467000
444	00:00:17.506000
445	00:00:17.546000
446	00:00:17.585000
447	00:00:17.625000
448	00:00:17.664000
449	00:00:17.704000
450	00:00:17.743000
451	00:00:17.783000
452	00:00:17.822000
453	00:00:17.862000
454	00:00:17.901000
455	00:00:17.941000
456	00:00:17.981000
457	00:00:18.020000
458	00:00:18.060000
459	00:00:18.099000
460	00:00:18.139000
461	00:00:18.178000
462	00:00:18.218000
463	00:00:18.257000
464	00:00:18.297000
465	00:00:18.336000
466	00:00:18.376000
467	00:00:18.415000
468	00:00:18.455000
469	00:00:18.494000
470	00:00:18.534000
471	00:00:18.573000
472	00:00:18.613000
473	00:00:18.652000
474	00:00:18.692000
475	00:00:18.731000
476	00:00:18.771000
477	00:00:18.810000
478	00:00:18.850000
479	00:00:18.889000
480	00:00:18.929000
481	00:00:18.968000
482	00:00:19.008000
483	00:00:19.047000
484	00:00:19.087000
485	00:00:19.126000
486	00:00:19.166000
487	00:00:19.205000
488	00:00:19.245000
489	00:00:19.284000
490	00:00:19.324000
491	00:00:19.363000
492	00:00:19.403000
493	00:00:19.442000
494	00:00:19.482000
495	00:00:19.522000
496	00:00:19.561000
497	00:00:19.601000
498	00:00:19.640000
499	00:00:19.680000
500	00:00:19.719000
501	00:00:19.759000
502	00:00:19.798000
503	00:00:19.838000
504	00:00:19.877000
505	00:00:19.917000
506	00:00:19.956000
507	00:00:19.996000
508	00:00:20.035000
509	00:00:20.075000
510	00:00:20.114000
511	00:00:20.154000
512	00:00:20.193000
513	00:00:20.233000
514	00:00:20.272000
515	00:00:20.312000
516	00:00:20.351000
517	00:00:20.391000
518	00:00:20.430000
519	00:00:20.470000
520	00:00:20.509000
521	00:00:20.549000
522	00:00:20.588000
523	00:00:20.628000
524	00:00:20.667000
525	00:00:20.707000
526	00:00:20.746000
527	00:00:20.786000
528	00:00:20.825000
529	00:00:20.865000
530	00:00:20.904000
531	00:00:20.944000
532	00:00:20.983000
533	00:00:21.023000
534	00:00:21.063000
535	00:00:21.102000
536	00:00:21.142000
537	00:00:21.181000
538	00:00:21.221000
539	00:00:21.260000
540	00:00:21.300000
541	00:00:21.339000
542	00:00:21.379000
543	00:00:21.418000
544	00:00:21.458000
545	00:00:21.497000
546	00:00:21.537000
547	00:00:21.576000
548	00:00:21.616000
549	00:00:21.655000
550	00:00:21.695000
551	00:00:21.734000
552	00:00:21.774000
553	00:00:21.813000
554	00:00:21.853000
555	00:00:21.892000
556	00:00:21.932000
557	00:00:21.971000
558	00:00:22.011000
559	00:00:22.050000
560	00:00:22.090000
561	00:00:22.129000
562	00:00:22.169000
563	00:00:22.208000
564	00:00:22.248000
565	00:00:22.287000
566	00:00:22.327000
567	00:00:22.366000
568	00:00:22.406000
569	00:00:22.445000
570	00:00:22.485000
571	00:00:22.524000
572	00:00:22.564000
573	00:00:22.603000
574	00:00:22.643000
575	00:00:22.682000
576	00:00:22.722000
577	00:00:22.761000
578	00:00:22.801000
579	00:00:22.841000
580	00:00:22.880000
581	00:00:22.920000
582	00:00:22.959000
583	00:00:22.999000
584	00:00:23.038000
585	00:00:23.078000
586	00:00:23.117000
587	00:00:23.157000
588	00:00:23.196000
589	00:00:23.236000
590	00:00:23.275000
591	00:00:23.315000
592	00:00:23.354000
593	00:00:23.394000
594	00:00:23.433000
595	00:00:23.473000
596	00:00:23.512000
597	00:00:23.552000
598	00:00:23.591000
599	00:00:23.631000
600	00:00:23.670000
601	00:00:23.710000
602	00:00:23.749000
603	00:00:23.789000
604	00:00:23.828000
605	00:00:23.868000
606	00:00:23.907000
607	00:00:23.947000
608	00:00:23.986000
609	00:00:24.026000
610	00:00:24.065000
611	00:00:24.105000
612	00:00:24.144000
613	00:00:24.184000
614	00:00:24.223000
615	00:00:24.263000
616	00:00:24.302000
617	00:00:24.342000
618	00:00:24.382000
619	00:00:24.421000
620	00:00:24.461000
621	00:00:24.500000
622	00:00:24.540000
623	00:00:24.579000
624	00:00:24.619000
625	00:00:24.658000
626	00:00:24.698000
627	00:00:24.737000
628	00:00:24.777000
629	00:00:24.816000
630	00:00:24.856000
631	00:00:24.895000
632	00:00:24.935000
633	00:00:24.974000
634	00:00:25.014000
635	00:00:25.053000
636	00:00:25.093000
637	00:00:25.132000
638	00:00:25.172000
639	00:00:25.211000
640	00:00:25.251000
641	00:00:25.290000
642	00:00:25.330000
643	00:00:25.369000
644	00:00:25.409000
645	00:00:25.448000
646	00:00:25.489000
647	00:00:25.528000
648	00:00:25.568000
649	00:00:25.607000
650	00:00:25.647000
651	00:00:25.686000
652	00:00:25.726000
653	00:00:25.765000
654	00:00:25.805000
655	00:00:25.845000
656	00:00:25.884000
657	00:00:25.924000
658	00:00:25.963000
659	00:00:26.003000
660	00:00:26.042000
661	00:00:26.081000
662	00:00:26.121000
663	00:00:26.161000
664	00:00:26.200000
665	00:00:26.240000
666	00:00:26.279000
667	00:00:26.319000
668	00:00:26.358000
669	00:00:26.398000
670	00:00:26.437000
671	00:00:26.477000
672	00:00:26.516000
673	00:00:26.556000
674	00:00:26.595000
675	00:00:26.635000
676	00:00:26.674000
677	00:00:26.714000
678	00:00:26.753000
679	00:00:26.793000
680	00:00:26.832000
681	00:00:26.872000
682	00:00:26.911000
683	00:00:26.951000
684	00:00:26.990000
685	00:00:27.030000
686	00:00:27.069000
687	00:00:27.109000
688	00:00:27.148000
689	00:00:27.188000
690	00:00:27.227000
691	00:00:27.267000
692	00:00:27.306000
693	00:00:27.346000
694	00:00:27.385000
695	00:00:27.425000
696	00:00:27.464000
697	00:00:27.504000
698	00:00:27.543000
699	00:00:27.583000
700	00:00:27.622000
701	00:00:27.662000
702	00:00:27.702000
703	00:00:27.741000
704	00:00:27.781000
705	00:00:27.820000
706	00:00:27.860000
707	00:00:27.899000
708	00:00:27.939000
709	00:00:27.978000
710	00:00:28.018000
711	00:00:28.057000
712	00:00:28.097000
713	00:00:28.136000
714	00:00:28.176000
715	00:00:28.215000
716	00:00:28.255000
717	00:00:28.294000
718	00:00:28.334000
719	00:00:28.373000
720	00:00:28.413000
721	00:00:28.452000
722	00:00:28.492000
723	00:00:28.531000
724	00:00:28.571000
725	00:00:28.610000
726	00:00:28.650000
727	00:00:28.689000
728	00:00:28.729000
729	00:00:28.768000
730	00:00:28.808000
731	00:00:28.847000
732	00:00:28.887000
733	00:00:28.926000
734	00:00:28.966000
735	00:00:29.005000
736	00:00:29.045000
737	00:00:29.084000
738	00:00:29.124000
739	00:00:29.164000
740	00:00:29.203000
741	00:00:29.243000
742	00:00:29.282000
743	00:00:29.322000
744	00:00:29.361000
745	00:00:29.401000
746	00:00:29.440000
747	00:00:29.480000
748	00:00:29.519000
749	00:00:29.559000
750	00:00:29.598000
751	00:00:29.638000
752	00:00:29.677000
753	00:00:29.717000
754	00:00:29.756000
755	00:00:29.796000
756	00:00:29.835000
757	00:00:29.875000
758	00:00:29.914000
759	00:00:29.954000
760	00:00:29.993000
761	00:00:30.033000
762	00:00:30.072000
763	00:00:30.112000
764	00:00:30.151000
765	00:00:30.191000
766	00:00:30.230000
767	00:00:30.270000
768	00:00:30.309000
769	00:00:30.349000
770	00:00:30.388000
771	00:00:30.428000
772	00:00:30.467000
773	00:00:30.507000
774	00:00:30.546000
775	00:00:30.586000
776	00:00:30.625000
777	00:00:30.665000
778	00:00:30.705000
779	00:00:30.744000
780	00:00:30.784000
781	00:00:30.823000
782	00:00:30.863000
783	00:00:30.902000
784	00:00:30.942000
785	00:00:30.981000
786	00:00:31.021000
787	00:00:31.060000
788	00:00:31.100000
789	00:00:31.139000
790	00:00:31.179000
791	00:00:31.218000
792	00:00:31.258000
793	00:00:31.297000
794	00:00:31.337000
795	00:00:31.376000
796	00:00:31.416000
797	00:00:31.455000
798	00:00:31.495000
799	00:00:31.534000
800	00:00:31.574000
801	00:00:31.613000
802	00:00:31.653000
803	00:00:31.692000
804	00:00:31.732000
805	00:00:31.771000
806	00:00:31.811000
807	00:00:31.850000
808	00:00:31.890000
809	00:00:31.929000
810	00:00:31.969000
811	00:00:32.008000
812	00:00:32.048000
813	00:00:32.087000
814	00:00:32.127000
815	00:00:32.166000
816	00:00:32.206000
817	00:00:32.245000
818	00:00:32.285000
819	00:00:32.324000
820	00:00:32.364000
821	00:00:32.403000
822	00:00:32.443000
823	00:00:32.482000
824	00:00:32.522000
825	00:00:32.562000
826	00:00:32.601000
827	00:00:32.641000
828	00:00:32.680000
829	00:00:32.720000
830	00:00:32.759000
831	00:00:32.799000
832	00:00:32.838000
833	00:00:32.878000
834	00:00:32.917000
835	00:00:32.957000
836	00:00:32.996000
837	00:00:33.036000
838	00:00:33.075000
839	00:00:33.115000
840	00:00:33.154000
841	00:00:33.194000
842	00:00:33.233000
843	00:00:33.273000
844	00:00:33.312000
845	00:00:33.352000
846	00:00:33.391000
847	00:00:33.431000
848	00:00:33.470000
849	00:00:33.510000
850	00:00:33.549000
851	00:00:33.589000
852	00:00:33.628000
853	00:00:33.668000
854	00:00:33.707000
855	00:00:33.747000
856	00:00:33.786000
857	00:00:33.826000
858	00:00:33.865000
859	00:00:33.905000
860	00:00:33.944000
861	00:00:33.984000
862	00:00:34.024000
863	00:00:34.063000
864	00:00:34.103000
865	00:00:34.142000
866	00:00:34.182000
867	00:00:34.221000
868	00:00:34.261000
869	00:00:34.300000
870	00:00:34.340000
871	00:00:34.379000
872	00:00:34.419000
873	00:00:34.458000
874	00:00:34.498000
875	00:00:34.537000
876	00:00:34.577000
877	00:00:34.616000
878	00:00:34.656000
879	00:00:34.695000
880	00:00:34.735000
881	00:00:34.774000
882	00:00:34.814000
883	00:00:34.853000
884	00:00:34.893000
885	00:00:34.932000
886	00:00:34.972000
887	00:00:35.011000
888	00:00:35.051000
889	00:00:35.090000
890	00:00:35.130000
891	00:00:35.169000
892	00:00:35.209000
893	00:00:35.248000
894	00:00:35.288000
895	00:00:35.327000
896	00:00:35.367000
897	00:00:35.406000
898	00:00:35.446000
899	00:00:35.486000
900	00:00:35.526000
901	00:00:35.566000
902	00:00:35.605000
903	00:00:35.645000
904	00:00:35.684000
905	00:00:35.724000
906	00:00:35.763000
907	00:00:35.803000
908	00:00:35.842000
909	00:00:35.882000
910	00:00:35.921000
911	00:00:35.961000
912	00:00:36
913	00:00:36.040000
914	00:00:36.079000
915	00:00:36.119000
916	00:00:36.158000
917	00:00:36.198000
918	00:00:36.237000
919	00:00:36.277000
920	00:00:36.316000
921	00:00:36.356000
922	00:00:36.395000
923	00:00:36.435000
924	00:00:36.474000
925	00:00:36.514000
926	00:00:36.553000
927	00:00:36.593000
928	00:00:36.632000
929	00:00:36.672000
930	00:00:36.711000
931	00:00:36.751000
932	00:00:36.790000
933	00:00:36.830000
934	00:00:36.869000
935	00:00:36.909000
936	00:00:36.948000
937	00:00:36.988000
938	00:00:37.027000
939	00:00:37.067000
940	00:00:37.106000
941	00:00:37.146000
942	00:00:37.185000
943	00:00:37.225000
944	00:00:37.264000
945	00:00:37.304000
946	00:00:37.344000
947	00:00:37.383000
948	00:00:37.423000
949	00:00:37.462000
950	00:00:37.502000
951	00:00:37.541000
952	00:00:37.581000
953	00:00:37.620000
954	00:00:37.660000
955	00:00:37.699000
956	00:00:37.739000
957	00:00:37.778000
958	00:00:37.818000
959	00:00:37.857000
960	00:00:37.897000
961	00:00:37.936000
962	00:00:37.976000
963	00:00:38.015000
964	00:00:38.055000
965	00:00:38.094000
966	00:00:38.134000
967	00:00:38.173000
968	00:00:38.213000
969	00:00:38.252000
970	00:00:38.292000
971	00:00:38.331000
972	00:00:38.371000
973	00:00:38.410000
974	00:00:38.450000
975	00:00:38.489000
976	00:00:38.529000
977	00:00:38.568000
978	00:00:38.608000
979	00:00:38.647000
980	00:00:38.687000
981	00:00:38.726000
982	00:00:38.766000
983	00:00:38.805000
984	00:00:38.845000
985	00:00:38.885000
986	00:00:38.924000
987	00:00:38.964000
988	00:00:39.003000
989	00:00:39.043000
990	00:00:39.082000
991	00:00:39.122000
992	00:00:39.161000
993	00:00:39.201000
994	00:00:39.240000
995	00:00:39.280000
996	00:00:39.319000
997	00:00:39.359000
998	00:00:39.398000
999	00:00:39.438000
1000	00:00:39.477000
1001	00:00:39.517000
1002	00:00:39.556000
1003	00:00:39.596000
1004	00:00:39.635000
1005	00:00:39.675000
1006	00:00:39.714000
1007	00:00:39.754000
1008	00:00:39.793000
1009	00:00:39.833000
1010	00:00:39.872000
1011	00:00:39.912000
1012	00:00:39.951000
1013	00:00:39.991000
1014	00:00:40.030000
1015	00:00:40.070000
1016	00:00:40.109000
1017	00:00:40.149000
1018	00:00:40.188000
1019	00:00:40.228000
1020	00:00:40.267000
1021	00:00:40.307000
1022	00:00:40.346000
1023	00:00:40.386000
1024	00:00:40.426000
1025	00:00:40.465000
1026	00:00:40.505000
1027	00:00:40.544000
1028	00:00:40.583000
1029	00:00:40.623000
1030	00:00:40.662000
1031	00:00:40.702000
1032	00:00:40.742000
1033	00:00:40.781000
1034	00:00:40.821000
1035	00:00:40.860000
1036	00:00:40.900000
1037	00:00:40.939000
1038	00:00:40.979000
1039	00:00:41.018000
1040	00:00:41.058000
1041	00:00:41.097000
1042	00:00:41.137000
1043	00:00:41.176000
1044	00:00:41.216000
1045	00:00:41.255000
1046	00:00:41.295000
1047	00:00:41.334000
1048	00:00:41.374000
1049	00:00:41.413000
1050	00:00:41.453000
1051	00:00:41.492000
1052	00:00:41.532000
1053	00:00:41.571000
1054	00:00:41.611000
1055	00:00:41.650000
1056	00:00:41.690000
1057	00:00:41.729000
1058	00:00:41.769000
1059	00:00:41.808000
1060	00:00:41.848000
1061	00:00:41.888000
1062	00:00:41.927000
1063	00:00:41.966000
1064	00:00:42.006000
1065	00:00:42.045000
1066	00:00:42.085000
1067	00:00:42.124000
1068	00:00:42.164000
1069	00:00:42.204000
1070	00:00:42.243000
1071	00:00:42.283000
1072	00:00:42.322000
1073	00:00:42.362000
1074	00:00:42.401000
1075	00:00:42.441000
1076	00:00:42.480000
1077	00:00:42.520000
1078	00:00:42.559000

## Sheet: #6
frame	time	PC	TB	ant isth	mid isth	post isth
948	00:00:37.395000
949	00:00:37.435000
950	00:00:37.474000
951	00:00:37.514000
952	00:00:37.553000
953	00:00:37.593000
954	00:00:37.632000
955	00:00:37.672000
956	00:00:37.711000
957	00:00:37.751000
958	00:00:37.790000
959	00:00:37.830000
960	00:00:37.869000
961	00:00:37.909000
962	00:00:37.948000
963	00:00:37.988000
964	00:00:38.027000
965	00:00:38.067000
966	00:00:38.106000
967	00:00:38.146000
968	00:00:38.185000
969	00:00:38.225000
970	00:00:38.264000
971	00:00:38.304000
972	00:00:38.343000
973	00:00:38.383000
974	00:00:38.422000
975	00:00:38.462000
976	00:00:38.501000
977	00:00:38.541000
978	00:00:38.580000
979	00:00:38.620000
980	00:00:38.659000
981	00:00:38.699000
982	00:00:38.738000
983	00:00:38.778000
984	00:00:38.818000
985	00:00:38.857000
986	00:00:38.897000
987	00:00:38.936000
988	00:00:38.976000
989	00:00:39.015000
990	00:00:39.055000
991	00:00:39.094000
992	00:00:39.134000
993	00:00:39.173000
994	00:00:39.213000
995	00:00:39.252000
996	00:00:39.292000
997	00:00:39.331000
998	00:00:39.371000
999	00:00:39.410000
1000	00:00:39.450000
1001	00:00:39.489000
1002	00:00:39.529000
1003	00:00:39.568000
1004	00:00:39.608000
1005	00:00:39.647000
1006	00:00:39.687000
1007	00:00:39.726000
1008	00:00:39.766000
1009	00:00:39.805000
1010	00:00:39.845000
1011	00:00:39.884000
1012	00:00:39.924000
1013	00:00:39.963000
1014	00:00:40.003000
1015	00:00:40.042000
1016	00:00:40.082000
1017	00:00:40.121000
1018	00:00:40.161000
1019	00:00:40.200000
1020	00:00:40.240000
1021	00:00:40.279000
1022	00:00:40.319000
1023	00:00:40.359000
1024	00:00:40.398000
1025	00:00:40.438000
1026	00:00:40.477000
1027	00:00:40.517000
1028	00:00:40.556000
1029	00:00:40.595000
1030	00:00:40.635000
1031	00:00:40.675000
1032	00:00:40.714000
1033	00:00:40.754000
1034	00:00:40.793000
1035	00:00:40.833000
1036	00:00:40.872000
1037	00:00:40.912000
1038	00:00:40.951000
1039	00:00:40.991000
1040	00:00:41.030000
1041	00:00:41.070000
1042	00:00:41.109000
1043	00:00:41.149000
1044	00:00:41.188000
1045	00:00:41.228000
1046	00:00:41.267000
1047	00:00:41.307000
1048	00:00:41.346000
1049	00:00:41.386000
1050	00:00:41.425000
1051	00:00:41.465000
1052	00:00:41.504000
1053	00:00:41.544000
1054	00:00:41.583000
1055	00:00:41.623000
1056	00:00:41.662000
1057	00:00:41.702000
1058	00:00:41.741000
1059	00:00:41.781000
1060	00:00:41.821000
1061	00:00:41.860000
1062	00:00:41.899000
1063	00:00:41.939000
1064	00:00:41.978000
1065	00:00:42.018000
1066	00:00:42.057000
1067	00:00:42.097000
1068	00:00:42.137000
1069	00:00:42.176000
1070	00:00:42.216000
1071	00:00:42.255000
1072	00:00:42.295000
1073	00:00:42.334000
1074	00:00:42.374000
1075	00:00:42.413000
1076	00:00:42.453000
1077	00:00:42.492000
1078	00:00:42.532000
1079	00:00:42.571000
1080	00:00:42.611000
1081	00:00:42.650000
1082	00:00:42.690000
1083	00:00:42.729000
1084	00:00:42.769000
1085	00:00:42.808000
1086	00:00:42.848000
1087	00:00:42.887000
1088	00:00:42.927000
1089	00:00:42.966000
1090	00:00:43.006000
1091	00:00:43.045000
1092	00:00:43.085000
1093	00:00:43.124000
1094	00:00:43.164000
1095	00:00:43.204000
1096	00:00:43.244000
1097	00:00:43.283000
1098	00:00:43.323000
1099	00:00:43.362000
1100	00:00:43.402000
1101	00:00:43.441000
1102	00:00:43.481000
1103	00:00:43.520000
1104	00:00:43.560000
1105	00:00:43.599000
1106	00:00:43.639000
1107	00:00:43.679000
1108	00:00:43.718000
1109	00:00:43.758000
1110	00:00:43.797000
1111	00:00:43.837000
1112	00:00:43.876000
1113	00:00:43.916000
1114	00:00:43.955000
1115	00:00:43.995000
1116	00:00:44.034000
1117	00:00:44.074000
1118	00:00:44.113000
1119	00:00:44.153000
1120	00:00:44.192000
1121	00:00:44.232000
1122	00:00:44.271000
1123	00:00:44.311000
1124	00:00:44.350000
1125	00:00:44.390000
1126	00:00:44.429000
1127	00:00:44.469000
1128	00:00:44.508000
1129	00:00:44.548000
1130	00:00:44.587000
1131	00:00:44.627000
1132	00:00:44.666000
1133	00:00:44.706000
1134	00:00:44.745000
1135	00:00:44.785000
1136	00:00:44.824000
1137	00:00:44.864000
1138	00:00:44.903000
1139	00:00:44.943000
1140	00:00:44.982000
1141	00:00:45.022000
1142	00:00:45.061000
1143	00:00:45.101000
1144	00:00:45.141000
1145	00:00:45.180000
1146	00:00:45.220000
1147	00:00:45.259000
1148	00:00:45.299000
1149	00:00:45.338000
1150	00:00:45.378000
1151	00:00:45.417000
1152	00:00:45.457000
1153	00:00:45.496000
1154	00:00:45.536000
1155	00:00:45.575000
1156	00:00:45.615000
1157	00:00:45.654000
1158	00:00:45.694000
1159	00:00:45.733000
1160	00:00:45.773000
1161	00:00:45.812000
1162	00:00:45.852000
1163	00:00:45.891000
1164	00:00:45.931000
1165	00:00:45.970000
1166	00:00:46.010000
1167	00:00:46.049000
1168	00:00:46.089000
1169	00:00:46.128000
1170	00:00:46.168000
1171	00:00:46.207000
1172	00:00:46.247000
1173	00:00:46.286000
1174	00:00:46.326000
1175	00:00:46.365000
1176	00:00:46.405000
1177	00:00:46.444000
1178	00:00:46.484000
1179	00:00:46.523000
1180	00:00:46.563000
1181	00:00:46.602000
1182	00:00:46.642000
1183	00:00:46.681000
1184	00:00:46.721000
1185	00:00:46.760000
1186	00:00:46.800000
1187	00:00:46.839000
1188	00:00:46.879000
1189	00:00:46.918000
1190	00:00:46.958000
1191	00:00:46.998000
1192	00:00:47.037000
1193	00:00:47.077000
1194	00:00:47.116000
1195	00:00:47.156000
1196	00:00:47.195000
1197	00:00:47.235000
1198	00:00:47.274000
1199	00:00:47.314000
1200	00:00:47.353000
1201	00:00:47.393000
1202	00:00:47.432000
1203	00:00:47.472000
1204	00:00:47.511000
1205	00:00:47.551000
1206	00:00:47.590000
1207	00:00:47.630000
1208	00:00:47.669000
1209	00:00:47.709000
1210	00:00:47.748000
1211	00:00:47.788000
1212	00:00:47.827000
1213	00:00:47.867000
1214	00:00:47.906000
1215	00:00:47.946000
1216	00:00:47.985000
1217	00:00:48.025000
1218	00:00:48.064000
1219	00:00:48.104000
1220	00:00:48.143000
1221	00:00:48.183000
1222	00:00:48.222000
1223	00:00:48.262000
1224	00:00:48.301000
1225	00:00:48.341000
1226	00:00:48.380000
1227	00:00:48.420000
1228	00:00:48.459000
1229	00:00:48.499000
1230	00:00:48.539000
1231	00:00:48.578000
1232	00:00:48.618000
1233	00:00:48.657000
1234	00:00:48.697000
1235	00:00:48.736000
1236	00:00:48.776000
1237	00:00:48.815000
1238	00:00:48.855000
1239	00:00:48.894000
1240	00:00:48.934000
1241	00:00:48.973000
1242	00:00:49.013000
1243	00:00:49.052000
1244	00:00:49.092000
1245	00:00:49.131000
1246	00:00:49.171000
1247	00:00:49.210000
1248	00:00:49.250000
1249	00:00:49.289000
1250	00:00:49.329000
1251	00:00:49.368000
1252	00:00:49.408000
1253	00:00:49.447000
1254	00:00:49.487000
1255	00:00:49.526000
1256	00:00:49.566000
1257	00:00:49.605000
1258	00:00:49.645000
1259	00:00:49.684000
1260	00:00:49.724000
1261	00:00:49.763000
1262	00:00:49.803000
1263	00:00:49.842000
1264	00:00:49.882000
1265	00:00:49.921000
1266	00:00:49.961000
1267	00:00:50.001000
1268	00:00:50.040000
1269	00:00:50.080000
1270	00:00:50.119000
1271	00:00:50.159000
1272	00:00:50.198000
1273	00:00:50.237000
1274	00:00:50.277000
1275	00:00:50.317000
1276	00:00:50.356000
1277	00:00:50.396000
1278	00:00:50.435000
1279	00:00:50.475000
1280	00:00:50.514000
1281	00:00:50.554000
1282	00:00:50.593000
1283	00:00:50.633000
1284	00:00:50.672000
1285	00:00:50.712000
1286	00:00:50.751000
1287	00:00:50.791000
1288	00:00:50.830000
1289	00:00:50.870000
1290	00:00:50.909000
1291	00:00:50.949000
1292	00:00:50.988000
1293	00:00:51.028000
1294	00:00:51.067000
1295	00:00:51.107000
1296	00:00:51.146000
1297	00:00:51.186000
1298	00:00:51.225000
1299	00:00:51.265000
1300	00:00:51.304000
1301	00:00:51.344000
1302	00:00:51.383000
1303	00:00:51.423000
1304	00:00:51.462000
1305	00:00:51.502000
1306	00:00:51.541000
1307	00:00:51.581000
1308	00:00:51.620000
1309	00:00:51.660000
1310	00:00:51.700000
1311	00:00:51.739000
1312	00:00:51.778000
1313	00:00:51.818000
1314	00:00:51.858000
1315	00:00:51.897000
1316	00:00:51.937000
1317	00:00:51.976000
1318	00:00:52.016000
1319	00:00:52.055000
1320	00:00:52.095000
1321	00:00:52.134000
1322	00:00:52.174000
1323	00:00:52.213000
1324	00:00:52.253000
1325	00:00:52.292000
1326	00:00:52.332000
1327	00:00:52.371000
1328	00:00:52.411000
1329	00:00:52.450000
1330	00:00:52.490000
1331	00:00:52.529000
1332	00:00:52.569000
1333	00:00:52.608000
1334	00:00:52.648000
1335	00:00:52.687000
1336	00:00:52.727000
1337	00:00:52.766000
1338	00:00:52.806000
1339	00:00:52.845000
1340	00:00:52.885000
1341	00:00:52.924000
1342	00:00:52.964000
1343	00:00:53.003000
1344	00:00:53.043000
1345	00:00:53.082000
1346	00:00:53.122000
1347	00:00:53.161000
1348	00:00:53.201000
1349	00:00:53.241000
1350	00:00:53.281000
1351	00:00:53.321000
1352	00:00:53.360000
1353	00:00:53.400000
1354	00:00:53.439000
1355	00:00:53.479000
1356	00:00:53.518000
1357	00:00:53.558000
1358	00:00:53.597000
1359	00:00:53.637000
1360	00:00:53.676000
1361	00:00:53.716000
1362	00:00:53.755000
1363	00:00:53.795000
1364	00:00:53.834000
1365	00:00:53.874000
1366	00:00:53.913000
1367	00:00:53.953000
1368	00:00:53.992000
1369	00:00:54.032000
1370	00:00:54.071000
1371	00:00:54.111000
1372	00:00:54.150000
1373	00:00:54.190000
1374	00:00:54.229000
1375	00:00:54.269000
1376	00:00:54.308000
1377	00:00:54.348000
1378	00:00:54.387000
1379	00:00:54.427000
1380	00:00:54.466000
1381	00:00:54.506000
1382	00:00:54.545000
1383	00:00:54.585000
1384	00:00:54.624000
1385	00:00:54.664000
1386	00:00:54.703000
1387	00:00:54.743000
1388	00:00:54.782000
1389	00:00:54.822000
1390	00:00:54.862000
1391	00:00:54.901000
1392	00:00:54.941000
1393	00:00:54.980000
1394	00:00:55.020000
1395	00:00:55.059000
1396	00:00:55.099000
1397	00:00:55.138000
1398	00:00:55.178000
1399	00:00:55.217000
1400	00:00:55.257000
1401	00:00:55.296000
1402	00:00:55.336000
1403	00:00:55.375000
1404	00:00:55.415000
1405	00:00:55.454000
1406	00:00:55.494000
1407	00:00:55.533000
1408	00:00:55.573000
1409	00:00:55.612000
1410	00:00:55.652000
1411	00:00:55.691000
1412	00:00:55.731000
1413	00:00:55.770000
1414	00:00:55.810000
1415	00:00:55.849000
1416	00:00:55.889000
1417	00:00:55.928000
1418	00:00:55.968000
1419	00:00:56.007000
1420	00:00:56.047000
1421	00:00:56.086000
1422	00:00:56.126000
1423	00:00:56.165000
1424	00:00:56.205000
1425	00:00:56.244000
1426	00:00:56.284000
1427	00:00:56.323000
1428	00:00:56.363000
1429	00:00:56.402000
1430	00:00:56.442000
1431	00:00:56.482000
1432	00:00:56.521000
1433	00:00:56.560000
1434	00:00:56.600000
1435	00:00:56.639000
1436	00:00:56.679000
1437	00:00:56.719000
1438	00:00:56.758000
1439	00:00:56.798000
1440	00:00:56.837000
1441	00:00:56.877000
1442	00:00:56.916000
1443	00:00:56.956000
1444	00:00:56.995000
1445	00:00:57.035000
1446	00:00:57.074000
1447	00:00:57.114000
1448	00:00:57.153000
1449	00:00:57.193000
1450	00:00:57.232000
1451	00:00:57.272000
1452	00:00:57.311000
1453	00:00:57.351000
1454	00:00:57.390000
1455	00:00:57.430000
1456	00:00:57.469000
1457	00:00:57.509000
1458	00:00:57.548000
1459	00:00:57.588000
1460	00:00:57.627000
1461	00:00:57.667000
1462	00:00:57.706000
1463	00:00:57.746000
1464	00:00:57.785000
1465	00:00:57.825000
1466	00:00:57.864000
1467	00:00:57.904000
1468	00:00:57.943000
1469	00:00:57.983000
1470	00:00:58.022000
1471	00:00:58.062000
1472	00:00:58.101000
1473	00:00:58.141000
1474	00:00:58.181000
1475	00:00:58.220000
1476	00:00:58.260000
1477	00:00:58.299000
1478	00:00:58.339000
1479	00:00:58.378000
1480	00:00:58.418000
1481	00:00:58.457000
1482	00:00:58.497000
1483	00:00:58.536000
1484	00:00:58.576000
1485	00:00:58.615000
1486	00:00:58.655000
1487	00:00:58.694000
1488	00:00:58.734000
1489	00:00:58.773000
1490	00:00:58.813000
1491	00:00:58.852000
1492	00:00:58.892000
1493	00:00:58.931000
1494	00:00:58.971000
1495	00:00:59.010000
1496	00:00:59.050000
1497	00:00:59.089000
1498	00:00:59.129000
1499	00:00:59.168000
1500	00:00:59.208000
1501	00:00:59.247000
1502	00:00:59.287000
1503	00:00:59.326000
1504	00:00:59.366000
1505	00:00:59.405000
1506	00:00:59.445000
1507	00:00:59.484000
1508	00:00:59.524000
1509	00:00:59.563000
1510	00:00:59.603000
1511	00:00:59.642000
1512	00:00:59.682000
1513	00:00:59.722000
1514	00:00:59.761000
1515	00:00:59.801000
1516	00:00:59.840000
1517	00:00:59.880000
1518	00:00:59.919000
1519	00:00:59.958000
1520	00:00:59.998000
1521	00:01:00.038000
1522	00:01:00.077000
1523	00:01:00.117000
1524	00:01:00.156000
1525	00:01:00.196000
1526	00:01:00.235000
1527	00:01:00.275000
1528	00:01:00.314000
1529	00:01:00.354000
1530	00:01:00.393000
1531	00:01:00.433000
1532	00:01:00.472000
1533	00:01:00.512000
1534	00:01:00.551000
1535	00:01:00.591000
1536	00:01:00.630000
1537	00:01:00.670000
1538	00:01:00.709000
1539	00:01:00.749000
1540	00:01:00.788000
1541	00:01:00.828000
1542	00:01:00.867000
1543	00:01:00.907000
1544	00:01:00.946000
1545	00:01:00.986000
1546	00:01:01.025000
1547	00:01:01.065000
1548	00:01:01.104000
1549	00:01:01.144000
1550	00:01:01.183000
1551	00:01:01.223000
1552	00:01:01.262000
1553	00:01:01.302000
1554	00:01:01.341000
1555	00:01:01.381000
1556	00:01:01.420000
1557	00:01:01.460000
1558	00:01:01.500000
1559	00:01:01.539000
1560	00:01:01.579000
1561	00:01:01.618000
1562	00:01:01.658000
1563	00:01:01.697000
1564	00:01:01.737000
1565	00:01:01.776000
1566	00:01:01.816000
1567	00:01:01.855000
1568	00:01:01.895000
1569	00:01:01.934000
1570	00:01:01.974000
1571	00:01:02.013000
1572	00:01:02.053000
1573	00:01:02.092000
1574	00:01:02.132000
1575	00:01:02.171000
1576	00:01:02.211000
1577	00:01:02.250000
1578	00:01:02.290000
1579	00:01:02.329000
1580	00:01:02.369000
1581	00:01:02.408000
1582	00:01:02.448000
1583	00:01:02.487000
1584	00:01:02.527000
1585	00:01:02.566000
1586	00:01:02.606000
1587	00:01:02.645000
1588	00:01:02.685000
1589	00:01:02.724000
1590	00:01:02.764000
1591	00:01:02.803000
1592	00:01:02.843000
1593	00:01:02.882000
1594	00:01:02.922000
1595	00:01:02.961000
1596	00:01:03.001000
1597	00:01:03.041000
1598	00:01:03.080000
1599	00:01:03.120000
1600	00:01:03.159000
1601	00:01:03.199000
1602	00:01:03.239000
1603	00:01:03.279000
1604	00:01:03.318000
1605	00:01:03.358000
1606	00:01:03.397000
1607	00:01:03.437000
1608	00:01:03.476000
1609	00:01:03.516000
1610	00:01:03.555000
1611	00:01:03.595000
1612	00:01:03.634000
1613	00:01:03.674000
1614	00:01:03.713000
1615	00:01:03.753000
1616	00:01:03.792000
1617	00:01:03.832000
1618	00:01:03.871000
1619	00:01:03.911000
1620	00:01:03.950000
1621	00:01:03.990000
1622	00:01:04.029000
1623	00:01:04.069000
1624	00:01:04.108000
1625	00:01:04.148000
1626	00:01:04.187000
1627	00:01:04.227000
1628	00:01:04.266000
1629	00:01:04.306000
1630	00:01:04.345000
1631	00:01:04.385000
1632	00:01:04.424000
1633	00:01:04.464000
1634	00:01:04.503000
1635	00:01:04.543000
1636	00:01:04.583000
1637	00:01:04.622000
1638	00:01:04.662000
1639	00:01:04.701000
1640	00:01:04.741000
1641	00:01:04.780000
1642	00:01:04.820000
1643	00:01:04.859000
1644	00:01:04.899000
1645	00:01:04.938000
1646	00:01:04.978000
1647	00:01:05.017000
1648	00:01:05.057000
1649	00:01:05.096000
1650	00:01:05.136000
1651	00:01:05.175000
1652	00:01:05.215000
1653	00:01:05.254000
1654	00:01:05.294000
1655	00:01:05.333000
1656	00:01:05.373000
1657	00:01:05.412000
1658	00:01:05.452000
1659	00:01:05.491000
1660	00:01:05.531000
1661	00:01:05.570000
1662	00:01:05.610000
1663	00:01:05.649000
1664	00:01:05.689000
1665	00:01:05.728000
1666	00:01:05.768000
1667	00:01:05.807000
1668	00:01:05.847000
1669	00:01:05.886000
1670	00:01:05.926000
1671	00:01:05.965000
1672	00:01:06.005000
1673	00:01:06.044000
1674	00:01:06.084000
1675	00:01:06.123000
1676	00:01:06.163000
1677	00:01:06.202000
1678	00:01:06.242000
1679	00:01:06.281000
1680	00:01:06.321000
1681	00:01:06.361000
1682	00:01:06.400000
1683	00:01:06.440000
1684	00:01:06.479000
1685	00:01:06.519000
1686	00:01:06.558000
1687	00:01:06.598000
1688	00:01:06.637000
1689	00:01:06.677000
1690	00:01:06.716000
1691	00:01:06.756000
1692	00:01:06.795000
1693	00:01:06.835000
1694	00:01:06.874000
1695	00:01:06.914000
1696	00:01:06.953000
1697	00:01:06.993000
1698	00:01:07.032000
1699	00:01:07.072000
1700	00:01:07.111000
1701	00:01:07.151000
1702	00:01:07.190000
1703	00:01:07.230000
1704	00:01:07.269000
1705	00:01:07.309000
1706	00:01:07.348000
1707	00:01:07.388000
1708	00:01:07.427000
1709	00:01:07.467000
1710	00:01:07.506000
1711	00:01:07.546000
1712	00:01:07.585000
1713	00:01:07.625000
1714	00:01:07.664000
1715	00:01:07.704000
1716	00:01:07.743000
1717	00:01:07.783000
1718	00:01:07.822000
1719	00:01:07.862000
1720	00:01:07.902000
1721	00:01:07.941000
1722	00:01:07.981000
1723	00:01:08.020000
1724	00:01:08.060000
1725	00:01:08.099000
1726	00:01:08.139000
1727	00:01:08.178000
1728	00:01:08.218000
1729	00:01:08.257000
1730	00:01:08.297000
1731	00:01:08.336000
1732	00:01:08.376000
1733	00:01:08.415000
1734	00:01:08.455000
1735	00:01:08.494000
1736	00:01:08.534000
1737	00:01:08.573000
1738	00:01:08.613000
1739	00:01:08.652000
1740	00:01:08.692000
1741	00:01:08.731000
1742	00:01:08.771000
1743	00:01:08.810000
1744	00:01:08.850000
1745	00:01:08.889000
1746	00:01:08.929000
1747	00:01:08.968000
1748	00:01:09.008000
1749	00:01:09.047000
1750	00:01:09.087000
1751	00:01:09.126000
1752	00:01:09.166000
1753	00:01:09.205000
1754	00:01:09.245000
1755	00:01:09.284000
1756	00:01:09.324000
1757	00:01:09.364000
1758	00:01:09.403000
1759	00:01:09.443000
1760	00:01:09.482000
1761	00:01:09.522000
1762	00:01:09.561000
1763	00:01:09.601000
1764	00:01:09.640000
1765	00:01:09.680000
1766	00:01:09.719000
1767	00:01:09.759000
1768	00:01:09.798000
1769	00:01:09.838000
1770	00:01:09.877000
1771	00:01:09.917000
1772	00:01:09.956000
1773	00:01:09.996000
1774	00:01:10.035000
1775	00:01:10.075000
1776	00:01:10.114000
1777	00:01:10.154000
1778	00:01:10.193000
1779	00:01:10.233000
1780	00:01:10.272000
1781	00:01:10.312000
1782	00:01:10.351000
1783	00:01:10.391000
1784	00:01:10.430000
1785	00:01:10.470000
1786	00:01:10.509000
1787	00:01:10.549000
1788	00:01:10.588000
1789	00:01:10.628000
1790	00:01:10.667000
1791	00:01:10.707000
1792	00:01:10.746000
1793	00:01:10.786000
1794	00:01:10.825000
1795	00:01:10.865000
1796	00:01:10.904000
1797	00:01:10.944000
1798	00:01:10.983000
1799	00:01:11.023000
1800	00:01:11.062000
1801	00:01:11.102000
1802	00:01:11.141000
1803	00:01:11.181000
1804	00:01:11.221000
1805	00:01:11.260000
1806	00:01:11.300000
1807	00:01:11.339000
1808	00:01:11.379000
1809	00:01:11.418000
1810	00:01:11.458000
1811	00:01:11.497000
1812	00:01:11.537000
1813	00:01:11.576000
1814	00:01:11.616000
1815	00:01:11.655000
1816	00:01:11.695000
1817	00:01:11.734000
1818	00:01:11.774000
1819	00:01:11.813000
1820	00:01:11.853000
1821	00:01:11.892000
1822	00:01:11.932000
1823	00:01:11.971000
1824	00:01:12.011000
1825	00:01:12.050000
1826	00:01:12.090000
1827	00:01:12.129000
1828	00:01:12.169000
1829	00:01:12.208000
1830	00:01:12.248000
1831	00:01:12.287000
1832	00:01:12.327000
1833	00:01:12.366000
1834	00:01:12.406000
1835	00:01:12.445000
1836	00:01:12.485000
1837	00:01:12.524000
1838	00:01:12.564000
1839	00:01:12.603000
1840	00:01:12.643000
1841	00:01:12.682000
1842	00:01:12.722000
1843	00:01:12.762000
1844	00:01:12.801000
1845	00:01:12.841000
1846	00:01:12.880000
1847	00:01:12.920000
1848	00:01:12.959000
1849	00:01:12.999000
1850	00:01:13.038000
1851	00:01:13.078000
1852	00:01:13.117000
1853	00:01:13.157000
1854	00:01:13.196000
1855	00:01:13.237000
1856	00:01:13.276000
1857	00:01:13.316000
1858	00:01:13.355000
1859	00:01:13.395000
1860	00:01:13.434000
1861	00:01:13.474000
1862	00:01:13.513000
1863	00:01:13.553000
1864	00:01:13.592000
1865	00:01:13.632000
1866	00:01:13.671000
1867	00:01:13.711000
1868	00:01:13.750000
1869	00:01:13.790000
1870	00:01:13.829000
1871	00:01:13.869000
1872	00:01:13.908000
1873	00:01:13.948000
1874	00:01:13.987000
1875	00:01:14.027000
1876	00:01:14.066000
1877	00:01:14.106000
1878	00:01:14.145000
1879	00:01:14.185000
1880	00:01:14.225000
1881	00:01:14.264000
1882	00:01:14.304000
1883	00:01:14.343000
1884	00:01:14.383000
1885	00:01:14.422000
1886	00:01:14.462000
1887	00:01:14.501000
1888	00:01:14.541000
1889	00:01:14.580000
1890	00:01:14.620000
1891	00:01:14.659000
1892	00:01:14.699000
1893	00:01:14.738000
1894	00:01:14.778000
1895	00:01:14.817000
1896	00:01:14.857000
1897	00:01:14.896000
1898	00:01:14.936000
1899	00:01:14.975000
1900	00:01:15.015000
1901	00:01:15.054000
1902	00:01:15.094000
1903	00:01:15.133000
1904	00:01:15.173000
1905	00:01:15.212000
1906	00:01:15.252000
1907	00:01:15.291000
1908	00:01:15.331000
1909	00:01:15.370000
1910	00:01:15.410000
1911	00:01:15.449000
1912	00:01:15.489000
1913	00:01:15.528000
1914	00:01:15.568000
1915	00:01:15.607000
1916	00:01:15.647000
1917	00:01:15.686000
1918	00:01:15.726000
1919	00:01:15.766000
1920	00:01:15.805000
1921	00:01:15.844000
1922	00:01:15.884000
1923	00:01:15.923000
1924	00:01:15.963000
1925	00:01:16.002000
1926	00:01:16.042000
1927	00:01:16.082000
1928	00:01:16.121000
1929	00:01:16.161000
1930	00:01:16.200000
1931	00:01:16.240000
1932	00:01:16.279000
1933	00:01:16.319000
1934	00:01:16.358000
1935	00:01:16.398000
1936	00:01:16.437000
1937	00:01:16.477000
1938	00:01:16.516000
1939	00:01:16.556000
1940	00:01:16.595000
1941	00:01:16.635000
1942	00:01:16.674000
1943	00:01:16.714000
1944	00:01:16.753000
1945	00:01:16.793000
1946	00:01:16.832000
1947	00:01:16.872000
1948	00:01:16.911000
1949	00:01:16.951000
1950	00:01:16.990000
1951	00:01:17.030000
1952	00:01:17.069000
1953	00:01:17.109000
1954	00:01:17.148000
1955	00:01:17.188000
1956	00:01:17.227000
1957	00:01:17.267000
1958	00:01:17.306000
1959	00:01:17.346000
1960	00:01:17.385000
1961	00:01:17.425000
1962	00:01:17.464000
1963	00:01:17.504000
1964	00:01:17.544000
1965	00:01:17.583000
1966	00:01:17.623000
1967	00:01:17.662000
1968	00:01:17.702000
1969	00:01:17.741000
1970	00:01:17.781000
1971	00:01:17.820000
1972	00:01:17.860000
1973	00:01:17.899000
1974	00:01:17.939000
1975	00:01:17.978000
1976	00:01:18.018000
1977	00:01:18.057000
1978	00:01:18.097000
1979	00:01:18.136000
1980	00:01:18.176000
1981	00:01:18.215000
1982	00:01:18.255000
1983	00:01:18.294000
1984	00:01:18.334000
1985	00:01:18.373000
1986	00:01:18.413000
1987	00:01:18.452000
1988	00:01:18.492000
1989	00:01:18.531000
1990	00:01:18.571000
1991	00:01:18.610000
1992	00:01:18.650000
1993	00:01:18.689000
1994	00:01:18.729000
1995	00:01:18.768000
1996	00:01:18.808000
1997	00:01:18.847000
1998	00:01:18.887000
1999	00:01:18.926000
2000	00:01:18.966000
2001	00:01:19.005000
2002	00:01:19.045000
2003	00:01:19.085000
2004	00:01:19.124000
2005	00:01:19.164000
2006	00:01:19.203000
2007	00:01:19.243000
2008	00:01:19.282000
2009	00:01:19.322000
2010	00:01:19.361000
2011	00:01:19.401000
2012	00:01:19.440000
2013	00:01:19.480000
2014	00:01:19.519000
2015	00:01:19.559000
2016	00:01:19.598000
2017	00:01:19.638000
2018	00:01:19.677000
2019	00:01:19.717000
2020	00:01:19.756000
2021	00:01:19.796000
2022	00:01:19.835000
2023	00:01:19.875000
2024	00:01:19.914000
2025	00:01:19.954000
2026	00:01:19.993000
2027	00:01:20.033000
2028	00:01:20.072000
2029	00:01:20.112000
2030	00:01:20.151000
2031	00:01:20.191000
2032	00:01:20.230000
2033	00:01:20.270000
2034	00:01:20.309000
2035	00:01:20.349000
2036	00:01:20.388000
2037	00:01:20.428000
2038	00:01:20.467000
2039	00:01:20.507000
2040	00:01:20.546000
2041	00:01:20.586000
2042	00:01:20.625000
2043	00:01:20.665000
2044	00:01:20.704000
2045	00:01:20.744000
2046	00:01:20.783000
2047	00:01:20.823000
2048	00:01:20.862000
2049	00:01:20.902000
2050	00:01:20.942000
2051	00:01:20.981000
2052	00:01:21.021000
2053	00:01:21.060000
2054	00:01:21.100000
2055	00:01:21.139000
2056	00:01:21.179000
2057	00:01:21.218000
2058	00:01:21.258000
2059	00:01:21.297000
2060	00:01:21.337000
2061	00:01:21.376000
2062	00:01:21.416000
2063	00:01:21.455000
2064	00:01:21.495000
2065	00:01:21.534000
2066	00:01:21.574000
2067	00:01:21.613000
2068	00:01:21.653000
2069	00:01:21.692000
2070	00:01:21.732000
2071	00:01:21.771000
2072	00:01:21.811000
2073	00:01:21.850000
2074	00:01:21.890000
2075	00:01:21.929000
2076	00:01:21.969000
2077	00:01:22.008000
2078	00:01:22.048000
2079	00:01:22.088000
2080	00:01:22.127000
2081	00:01:22.166000
2082	00:01:22.206000
2083	00:01:22.245000
2084	00:01:22.285000
2085	00:01:22.324000
2086	00:01:22.364000
2087	00:01:22.404000
2088	00:01:22.443000
2089	00:01:22.483000
2090	00:01:22.522000
2091	00:01:22.562000
2092	00:01:22.601000
2093	00:01:22.641000
2094	00:01:22.680000
2095	00:01:22.720000
2096	00:01:22.759000
2097	00:01:22.799000
2098	00:01:22.838000
2099	00:01:22.878000
2100	00:01:22.917000
2101	00:01:22.957000
2102	00:01:22.996000
2103	00:01:23.036000
2104	00:01:23.075000
2105	00:01:23.115000
2106	00:01:23.154000
2107	00:01:23.194000
2108	00:01:23.234000
2109	00:01:23.274000
2110	00:01:23.313000
2111	00:01:23.353000
2112	00:01:23.392000
2113	00:01:23.432000
2114	00:01:23.471000
2115	00:01:23.511000
2116	00:01:23.550000
2117	00:01:23.590000
2118	00:01:23.629000
2119	00:01:23.669000
2120	00:01:23.708000
2121	00:01:23.748000
2122	00:01:23.787000
2123	00:01:23.827000
2124	00:01:23.866000
2125	00:01:23.906000
2126	00:01:23.946000
2127	00:01:23.985000
2128	00:01:24.025000
2129	00:01:24.064000
2130	00:01:24.104000
2131	00:01:24.143000
2132	00:01:24.183000
2133	00:01:24.222000
2134	00:01:24.262000
2135	00:01:24.301000
2136	00:01:24.341000
2137	00:01:24.380000
2138	00:01:24.420000
2139	00:01:24.459000
2140	00:01:24.499000
2141	00:01:24.538000
2142	00:01:24.578000
2143	00:01:24.617000
2144	00:01:24.657000
2145	00:01:24.696000
2146	00:01:24.736000
2147	00:01:24.775000
2148	00:01:24.815000
2149	00:01:24.854000
2150	00:01:24.894000
2151	00:01:24.933000
2152	00:01:24.973000
2153	00:01:25.012000
2154	00:01:25.052000
2155	00:01:25.091000
2156	00:01:25.131000
2157	00:01:25.170000
2158	00:01:25.210000
2159	00:01:25.249000
2160	00:01:25.289000
2161	00:01:25.328000
2162	00:01:25.368000
2163	00:01:25.408000
2164	00:01:25.447000
2165	00:01:25.486000
2166	00:01:25.526000
2167	00:01:25.565000
2168	00:01:25.605000
2169	00:01:25.644000
2170	00:01:25.684000
2171	00:01:25.724000
2172	00:01:25.763000
2173	00:01:25.803000
2174	00:01:25.842000
2175	00:01:25.882000
2176	00:01:25.921000
2177	00:01:25.961000
2178	00:01:26
2179	00:01:26.040000
2180	00:01:26.079000
2181	00:01:26.119000
2182	00:01:26.158000
2183	00:01:26.198000
2184	00:01:26.237000
2185	00:01:26.277000
2186	00:01:26.316000
2187	00:01:26.356000
2188	00:01:26.395000
2189	00:01:26.435000
2190	00:01:26.474000
2191	00:01:26.514000
2192	00:01:26.553000
2193	00:01:26.593000
2194	00:01:26.632000
2195	00:01:26.672000
2196	00:01:26.711000
2197	00:01:26.751000
2198	00:01:26.790000
2199	00:01:26.830000
2200	00:01:26.869000
2201	00:01:26.909000
2202	00:01:26.948000
2203	00:01:26.988000
2204	00:01:27.027000
2205	00:01:27.067000
2206	00:01:27.106000
2207	00:01:27.146000
2208	00:01:27.185000
2209	00:01:27.225000
2210	00:01:27.265000
2211	00:01:27.304000

## Sheet: #5
frame	time	PC	TB	ant isth	mid isth	post isth
695	00:00:27.424000
696	00:00:27.464000
697	00:00:27.503000
698	00:00:27.543000
699	00:00:27.582000
700	00:00:27.622000
701	00:00:27.661000
702	00:00:27.700000
703	00:00:27.740000
704	00:00:27.780000
705	00:00:27.819000
706	00:00:27.859000
707	00:00:27.898000
708	00:00:27.938000
709	00:00:27.977000
710	00:00:28.017000
711	00:00:28.056000
712	00:00:28.096000
713	00:00:28.135000
714	00:00:28.175000
715	00:00:28.214000
716	00:00:28.254000
717	00:00:28.293000
718	00:00:28.333000
719	00:00:28.372000
720	00:00:28.412000
721	00:00:28.451000
722	00:00:28.491000
723	00:00:28.530000
724	00:00:28.570000
725	00:00:28.609000
726	00:00:28.649000
727	00:00:28.688000
728	00:00:28.728000
729	00:00:28.767000
730	00:00:28.807000
731	00:00:28.846000
732	00:00:28.886000
733	00:00:28.925000
734	00:00:28.965000
735	00:00:29.004000
736	00:00:29.044000
737	00:00:29.083000
738	00:00:29.123000
739	00:00:29.162000
740	00:00:29.202000
741	00:00:29.241000
742	00:00:29.281000
743	00:00:29.321000
744	00:00:29.360000
745	00:00:29.400000
746	00:00:29.439000
747	00:00:29.479000
748	00:00:29.518000
749	00:00:29.558000
750	00:00:29.597000
751	00:00:29.637000
752	00:00:29.676000
753	00:00:29.716000
754	00:00:29.755000
755	00:00:29.795000
756	00:00:29.834000
757	00:00:29.874000
758	00:00:29.913000
759	00:00:29.953000
760	00:00:29.992000
761	00:00:30.032000
762	00:00:30.071000
763	00:00:30.111000
764	00:00:30.150000
765	00:00:30.190000
766	00:00:30.229000
767	00:00:30.269000
768	00:00:30.308000
769	00:00:30.348000
770	00:00:30.387000
771	00:00:30.427000
772	00:00:30.466000
773	00:00:30.506000
774	00:00:30.545000
775	00:00:30.585000
776	00:00:30.624000
777	00:00:30.664000
778	00:00:30.703000
779	00:00:30.743000
780	00:00:30.783000
781	00:00:30.822000
782	00:00:30.862000
783	00:00:30.901000
784	00:00:30.941000
785	00:00:30.980000
786	00:00:31.020000
787	00:00:31.059000
788	00:00:31.099000
789	00:00:31.138000
790	00:00:31.178000
791	00:00:31.217000
792	00:00:31.257000
793	00:00:31.296000
794	00:00:31.336000
795	00:00:31.375000
796	00:00:31.415000
797	00:00:31.454000
798	00:00:31.494000
799	00:00:31.533000
800	00:00:31.573000
801	00:00:31.612000
802	00:00:31.652000
803	00:00:31.691000
804	00:00:31.731000
805	00:00:31.770000
806	00:00:31.810000
807	00:00:31.849000
808	00:00:31.889000
809	00:00:31.928000
810	00:00:31.968000
811	00:00:32.007000
812	00:00:32.047000
813	00:00:32.086000
814	00:00:32.126000
815	00:00:32.165000
816	00:00:32.205000
817	00:00:32.244000
818	00:00:32.284000
819	00:00:32.324000
820	00:00:32.363000
821	00:00:32.403000
822	00:00:32.442000
823	00:00:32.482000
824	00:00:32.521000
825	00:00:32.560000
826	00:00:32.600000
827	00:00:32.640000
828	00:00:32.679000
829	00:00:32.719000
830	00:00:32.758000
831	00:00:32.798000
832	00:00:32.837000
833	00:00:32.877000
834	00:00:32.916000
835	00:00:32.956000
836	00:00:32.995000
837	00:00:33.035000
838	00:00:33.074000
839	00:00:33.114000
840	00:00:33.153000
841	00:00:33.193000
842	00:00:33.232000
843	00:00:33.272000
844	00:00:33.311000
845	00:00:33.351000
846	00:00:33.390000
847	00:00:33.430000
848	00:00:33.469000
849	00:00:33.509000
850	00:00:33.548000
851	00:00:33.588000
852	00:00:33.627000
853	00:00:33.667000
854	00:00:33.706000
855	00:00:33.746000
856	00:00:33.785000
857	00:00:33.825000
858	00:00:33.864000
859	00:00:33.904000
860	00:00:33.943000
861	00:00:33.983000
862	00:00:34.022000
863	00:00:34.062000
864	00:00:34.102000
865	00:00:34.141000
866	00:00:34.181000
867	00:00:34.220000
868	00:00:34.260000
869	00:00:34.299000
870	00:00:34.339000
871	00:00:34.378000
872	00:00:34.418000
873	00:00:34.457000
874	00:00:34.497000
875	00:00:34.536000
876	00:00:34.576000
877	00:00:34.615000
878	00:00:34.655000
879	00:00:34.694000
880	00:00:34.734000
881	00:00:34.773000
882	00:00:34.813000
883	00:00:34.852000
884	00:00:34.892000
885	00:00:34.931000
886	00:00:34.971000
887	00:00:35.011000
888	00:00:35.051000
889	00:00:35.090000
890	00:00:35.130000
891	00:00:35.169000
892	00:00:35.209000
893	00:00:35.248000
894	00:00:35.288000
895	00:00:35.327000
896	00:00:35.367000
897	00:00:35.406000
898	00:00:35.446000
899	00:00:35.485000
900	00:00:35.525000
901	00:00:35.564000
902	00:00:35.604000
903	00:00:35.644000
904	00:00:35.683000
905	00:00:35.723000
906	00:00:35.762000
907	00:00:35.802000
908	00:00:35.841000
909	00:00:35.881000
910	00:00:35.920000
911	00:00:35.960000
912	00:00:35.999000
913	00:00:36.039000
914	00:00:36.078000
915	00:00:36.118000
916	00:00:36.157000
917	00:00:36.197000
918	00:00:36.236000
919	00:00:36.276000
920	00:00:36.315000
921	00:00:36.355000
922	00:00:36.394000
923	00:00:36.434000
924	00:00:36.473000
925	00:00:36.513000
926	00:00:36.552000
927	00:00:36.592000
928	00:00:36.631000
929	00:00:36.671000
930	00:00:36.710000
931	00:00:36.750000
932	00:00:36.789000
933	00:00:36.829000
934	00:00:36.868000
935	00:00:36.908000
936	00:00:36.947000
937	00:00:36.987000
938	00:00:37.026000
939	00:00:37.066000
940	00:00:37.105000
941	00:00:37.145000
942	00:00:37.185000
943	00:00:37.224000
944	00:00:37.264000
945	00:00:37.303000
946	00:00:37.342000
947	00:00:37.382000
948	00:00:37.421000
949	00:00:37.461000
950	00:00:37.501000
951	00:00:37.540000
952	00:00:37.580000
953	00:00:37.619000
954	00:00:37.659000
955	00:00:37.698000
956	00:00:37.738000
957	00:00:37.777000
958	00:00:37.817000
959	00:00:37.856000
960	00:00:37.896000
961	00:00:37.935000
962	00:00:37.975000
963	00:00:38.014000
964	00:00:38.054000
965	00:00:38.093000
966	00:00:38.133000
967	00:00:38.172000
968	00:00:38.212000
969	00:00:38.251000
970	00:00:38.291000
971	00:00:38.330000
972	00:00:38.370000
973	00:00:38.409000
974	00:00:38.449000
975	00:00:38.488000
976	00:00:38.528000
977	00:00:38.567000
978	00:00:38.607000
979	00:00:38.646000
980	00:00:38.686000
981	00:00:38.725000
982	00:00:38.765000
983	00:00:38.804000
984	00:00:38.844000
985	00:00:38.883000
986	00:00:38.923000
987	00:00:38.963000
988	00:00:39.002000
989	00:00:39.042000
990	00:00:39.081000
991	00:00:39.121000
992	00:00:39.160000
993	00:00:39.200000
994	00:00:39.239000
995	00:00:39.279000
996	00:00:39.318000
997	00:00:39.358000
998	00:00:39.397000
999	00:00:39.437000
1000	00:00:39.476000
1001	00:00:39.516000
1002	00:00:39.555000
1003	00:00:39.595000
1004	00:00:39.634000
1005	00:00:39.674000
1006	00:00:39.713000
1007	00:00:39.753000
1008	00:00:39.792000
1009	00:00:39.832000
1010	00:00:39.871000
1011	00:00:39.911000
1012	00:00:39.950000
1013	00:00:39.990000
1014	00:00:40.029000
1015	00:00:40.069000
1016	00:00:40.108000
1017	00:00:40.148000
1018	00:00:40.187000
1019	00:00:40.227000
1020	00:00:40.266000
1021	00:00:40.306000
1022	00:00:40.345000
1023	00:00:40.385000
1024	00:00:40.424000
1025	00:00:40.464000
1026	00:00:40.504000
1027	00:00:40.543000
1028	00:00:40.583000
1029	00:00:40.622000
1030	00:00:40.662000
1031	00:00:40.701000
1032	00:00:40.741000
1033	00:00:40.780000
1034	00:00:40.820000
1035	00:00:40.859000
1036	00:00:40.899000
1037	00:00:40.938000
1038	00:00:40.978000
1039	00:00:41.017000
1040	00:00:41.057000
1041	00:00:41.096000
1042	00:00:41.136000
1043	00:00:41.175000
1044	00:00:41.215000
1045	00:00:41.254000
1046	00:00:41.294000
1047	00:00:41.333000
1048	00:00:41.373000
1049	00:00:41.412000
1050	00:00:41.452000
1051	00:00:41.491000
1052	00:00:41.531000
1053	00:00:41.570000
1054	00:00:41.610000
1055	00:00:41.649000
1056	00:00:41.689000
1057	00:00:41.728000
1058	00:00:41.768000
1059	00:00:41.807000
1060	00:00:41.847000
1061	00:00:41.886000
1062	00:00:41.926000
1063	00:00:41.965000
1064	00:00:42.005000
1065	00:00:42.045000
1066	00:00:42.084000
1067	00:00:42.124000
1068	00:00:42.163000
1069	00:00:42.202000
1070	00:00:42.242000
1071	00:00:42.282000
1072	00:00:42.321000
1073	00:00:42.361000
1074	00:00:42.400000
1075	00:00:42.440000
1076	00:00:42.479000
1077	00:00:42.519000
1078	00:00:42.558000
1079	00:00:42.598000
1080	00:00:42.637000
1081	00:00:42.677000
1082	00:00:42.716000
1083	00:00:42.756000
1084	00:00:42.795000
1085	00:00:42.835000
1086	00:00:42.874000
1087	00:00:42.914000
1088	00:00:42.953000
1089	00:00:42.993000
1090	00:00:43.032000
1091	00:00:43.072000
1092	00:00:43.111000
1093	00:00:43.151000
1094	00:00:43.190000
1095	00:00:43.230000
1096	00:00:43.269000
1097	00:00:43.309000
1098	00:00:43.348000
1099	00:00:43.388000
1100	00:00:43.427000
1101	00:00:43.467000
1102	00:00:43.506000
1103	00:00:43.546000
1104	00:00:43.585000
1105	00:00:43.625000
1106	00:00:43.664000
1107	00:00:43.704000
1108	00:00:43.743000
1109	00:00:43.783000
1110	00:00:43.823000
1111	00:00:43.862000
1112	00:00:43.902000
1113	00:00:43.941000
1114	00:00:43.981000
1115	00:00:44.020000
1116	00:00:44.060000
1117	00:00:44.099000
1118	00:00:44.139000
1119	00:00:44.178000
1120	00:00:44.218000
1121	00:00:44.257000
1122	00:00:44.297000
1123	00:00:44.336000
1124	00:00:44.376000
1125	00:00:44.415000
1126	00:00:44.455000
1127	00:00:44.494000
1128	00:00:44.534000
1129	00:00:44.573000
1130	00:00:44.613000
1131	00:00:44.652000
1132	00:00:44.692000
1133	00:00:44.731000
1134	00:00:44.771000
1135	00:00:44.810000
1136	00:00:44.850000
1137	00:00:44.889000
1138	00:00:44.929000
1139	00:00:44.968000
1140	00:00:45.009000
1141	00:00:45.048000
1142	00:00:45.088000
1143	00:00:45.127000
1144	00:00:45.167000
1145	00:00:45.206000
1146	00:00:45.246000
1147	00:00:45.285000
1148	00:00:45.325000
1149	00:00:45.365000
1150	00:00:45.404000
1151	00:00:45.444000
1152	00:00:45.483000
1153	00:00:45.523000
1154	00:00:45.562000
1155	00:00:45.602000
1156	00:00:45.641000
1157	00:00:45.681000
1158	00:00:45.720000
1159	00:00:45.760000
1160	00:00:45.799000
1161	00:00:45.839000
1162	00:00:45.878000
1163	00:00:45.918000
1164	00:00:45.957000
1165	00:00:45.997000
1166	00:00:46.036000
1167	00:00:46.076000
1168	00:00:46.115000
1169	00:00:46.155000
1170	00:00:46.194000
1171	00:00:46.234000
1172	00:00:46.273000
1173	00:00:46.313000
1174	00:00:46.352000
1175	00:00:46.392000
1176	00:00:46.431000
1177	00:00:46.471000
1178	00:00:46.510000
1179	00:00:46.550000
1180	00:00:46.589000
1181	00:00:46.629000
1182	00:00:46.668000
1183	00:00:46.708000
1184	00:00:46.747000
1185	00:00:46.787000
1186	00:00:46.827000
1187	00:00:46.866000
1188	00:00:46.906000
1189	00:00:46.945000
1190	00:00:46.985000
1191	00:00:47.024000
1192	00:00:47.063000
1193	00:00:47.103000
1194	00:00:47.143000
1195	00:00:47.182000
1196	00:00:47.222000
1197	00:00:47.261000
1198	00:00:47.301000
1199	00:00:47.340000
1200	00:00:47.380000
1201	00:00:47.419000
1202	00:00:47.459000
1203	00:00:47.498000
1204	00:00:47.538000
1205	00:00:47.577000
1206	00:00:47.617000
1207	00:00:47.656000
1208	00:00:47.696000
1209	00:00:47.735000
1210	00:00:47.775000
1211	00:00:47.814000
1212	00:00:47.854000
1213	00:00:47.893000
1214	00:00:47.933000
1215	00:00:47.972000
1216	00:00:48.012000
1217	00:00:48.051000
1218	00:00:48.091000
1219	00:00:48.130000
1220	00:00:48.170000
1221	00:00:48.209000
1222	00:00:48.249000
1223	00:00:48.288000
1224	00:00:48.328000
1225	00:00:48.367000
1226	00:00:48.407000
1227	00:00:48.446000
1228	00:00:48.486000
1229	00:00:48.525000
1230	00:00:48.565000
1231	00:00:48.604000
1232	00:00:48.644000
1233	00:00:48.684000
1234	00:00:48.723000
1235	00:00:48.763000
1236	00:00:48.802000
1237	00:00:48.842000
1238	00:00:48.881000
1239	00:00:48.921000
1240	00:00:48.960000
1241	00:00:49
1242	00:00:49.039000
1243	00:00:49.079000
1244	00:00:49.118000
1245	00:00:49.158000
1246	00:00:49.197000
1247	00:00:49.237000
1248	00:00:49.276000
1249	00:00:49.316000
1250	00:00:49.355000
1251	00:00:49.395000
1252	00:00:49.434000
1253	00:00:49.474000
1254	00:00:49.513000
1255	00:00:49.553000
1256	00:00:49.592000
1257	00:00:49.632000
1258	00:00:49.671000
1259	00:00:49.711000
1260	00:00:49.750000
1261	00:00:49.790000
1262	00:00:49.829000
1263	00:00:49.869000
1264	00:00:49.908000
1265	00:00:49.948000
1266	00:00:49.987000
1267	00:00:50.027000
1268	00:00:50.066000
1269	00:00:50.106000
1270	00:00:50.146000
1271	00:00:50.185000
1272	00:00:50.225000
1273	00:00:50.264000
1274	00:00:50.304000
1275	00:00:50.343000
1276	00:00:50.383000
1277	00:00:50.422000
1278	00:00:50.462000
1279	00:00:50.501000
1280	00:00:50.541000
1281	00:00:50.580000
1282	00:00:50.620000
1283	00:00:50.659000
1284	00:00:50.699000
1285	00:00:50.738000
1286	00:00:50.778000
1287	00:00:50.817000
1288	00:00:50.857000
1289	00:00:50.896000
1290	00:00:50.936000
1291	00:00:50.975000
1292	00:00:51.015000
1293	00:00:51.054000
1294	00:00:51.094000
1295	00:00:51.133000
1296	00:00:51.173000
1297	00:00:51.212000
1298	00:00:51.252000
1299	00:00:51.291000
1300	00:00:51.331000
1301	00:00:51.370000
1302	00:00:51.410000
1303	00:00:51.449000
1304	00:00:51.489000
1305	00:00:51.528000
1306	00:00:51.568000
1307	00:00:51.607000
1308	00:00:51.647000
1309	00:00:51.687000
1310	00:00:51.726000
1311	00:00:51.766000
1312	00:00:51.805000
1313	00:00:51.844000
1314	00:00:51.884000
1315	00:00:51.923000
1316	00:00:51.963000
1317	00:00:52.003000
1318	00:00:52.042000
1319	00:00:52.082000
1320	00:00:52.121000
1321	00:00:52.161000
1322	00:00:52.200000
1323	00:00:52.240000
1324	00:00:52.279000
1325	00:00:52.319000
1326	00:00:52.358000
1327	00:00:52.398000
1328	00:00:52.437000
1329	00:00:52.477000
1330	00:00:52.516000
1331	00:00:52.556000
1332	00:00:52.595000
1333	00:00:52.635000
1334	00:00:52.674000
1335	00:00:52.714000
1336	00:00:52.753000
1337	00:00:52.793000
1338	00:00:52.832000
1339	00:00:52.872000
1340	00:00:52.911000
1341	00:00:52.951000
1342	00:00:52.990000
1343	00:00:53.030000
1344	00:00:53.069000
1345	00:00:53.109000
1346	00:00:53.148000
1347	00:00:53.188000
1348	00:00:53.227000
1349	00:00:53.267000
1350	00:00:53.306000
1351	00:00:53.346000
1352	00:00:53.385000
1353	00:00:53.425000
1354	00:00:53.464000
1355	00:00:53.504000
1356	00:00:53.544000
1357	00:00:53.583000
1358	00:00:53.623000
1359	00:00:53.662000
1360	00:00:53.702000
1361	00:00:53.741000
1362	00:00:53.781000
1363	00:00:53.820000
1364	00:00:53.860000
1365	00:00:53.899000
1366	00:00:53.939000
1367	00:00:53.978000
1368	00:00:54.018000
1369	00:00:54.057000
1370	00:00:54.097000
1371	00:00:54.136000
1372	00:00:54.176000
1373	00:00:54.215000
1374	00:00:54.255000
1375	00:00:54.294000
1376	00:00:54.334000
1377	00:00:54.373000
1378	00:00:54.413000
1379	00:00:54.452000
1380	00:00:54.492000
1381	00:00:54.531000
1382	00:00:54.571000
1383	00:00:54.610000
1384	00:00:54.650000
1385	00:00:54.689000
1386	00:00:54.729000
1387	00:00:54.768000
1388	00:00:54.808000
1389	00:00:54.847000
1390	00:00:54.887000
1391	00:00:54.926000
1392	00:00:54.966000
1393	00:00:55.007000
1394	00:00:55.046000
1395	00:00:55.086000
1396	00:00:55.125000
1397	00:00:55.165000
1398	00:00:55.204000
1399	00:00:55.244000
1400	00:00:55.283000
1401	00:00:55.323000
1402	00:00:55.362000
1403	00:00:55.402000
1404	00:00:55.441000
1405	00:00:55.481000
1406	00:00:55.520000
1407	00:00:55.560000
1408	00:00:55.599000
1409	00:00:55.639000
1410	00:00:55.678000
1411	00:00:55.718000
1412	00:00:55.757000
1413	00:00:55.797000
1414	00:00:55.836000
1415	00:00:55.876000
1416	00:00:55.915000
1417	00:00:55.955000
1418	00:00:55.994000
1419	00:00:56.034000
1420	00:00:56.073000
1421	00:00:56.113000
1422	00:00:56.152000
1423	00:00:56.192000
1424	00:00:56.231000
1425	00:00:56.271000
1426	00:00:56.310000
1427	00:00:56.350000
1428	00:00:56.389000
1429	00:00:56.429000
1430	00:00:56.468000
1431	00:00:56.508000
1432	00:00:56.548000
1433	00:00:56.587000
1434	00:00:56.627000
1435	00:00:56.666000
1436	00:00:56.706000
1437	00:00:56.745000
1438	00:00:56.785000
1439	00:00:56.824000
1440	00:00:56.864000
1441	00:00:56.903000
1442	00:00:56.943000
1443	00:00:56.982000
1444	00:00:57.022000
1445	00:00:57.061000
1446	00:00:57.101000
1447	00:00:57.140000
1448	00:00:57.180000
1449	00:00:57.219000
1450	00:00:57.259000
1451	00:00:57.298000
1452	00:00:57.338000
1453	00:00:57.377000
1454	00:00:57.417000
1455	00:00:57.456000
1456	00:00:57.496000
1457	00:00:57.535000
1458	00:00:57.575000
1459	00:00:57.614000
1460	00:00:57.654000
1461	00:00:57.693000
1462	00:00:57.733000
1463	00:00:57.772000
1464	00:00:57.812000
1465	00:00:57.851000
1466	00:00:57.891000
1467	00:00:57.930000
1468	00:00:57.970000
1469	00:00:58.009000
1470	00:00:58.049000
1471	00:00:58.088000
1472	00:00:58.128000
1473	00:00:58.167000
1474	00:00:58.207000
1475	00:00:58.246000
1476	00:00:58.286000
1477	00:00:58.326000
1478	00:00:58.365000
1479	00:00:58.405000
1480	00:00:58.444000
1481	00:00:58.484000
1482	00:00:58.523000
1483	00:00:58.563000
1484	00:00:58.602000
1485	00:00:58.642000
1486	00:00:58.681000
1487	00:00:58.721000
1488	00:00:58.760000
1489	00:00:58.800000
1490	00:00:58.839000
1491	00:00:58.879000
1492	00:00:58.918000
1493	00:00:58.958000
1494	00:00:58.997000
1495	00:00:59.037000
1496	00:00:59.076000
1497	00:00:59.116000
1498	00:00:59.155000
1499	00:00:59.195000
1500	00:00:59.234000
1501	00:00:59.274000
1502	00:00:59.313000
1503	00:00:59.353000
1504	00:00:59.392000
1505	00:00:59.432000
1506	00:00:59.471000
1507	00:00:59.511000
1508	00:00:59.550000
1509	00:00:59.590000
1510	00:00:59.629000
1511	00:00:59.669000
1512	00:00:59.708000
1513	00:00:59.748000
1514	00:00:59.787000
1515	00:00:59.827000
1516	00:00:59.867000
1517	00:00:59.906000
1518	00:00:59.946000
1519	00:00:59.985000
1520	00:01:00.025000
1521	00:01:00.064000
1522	00:01:00.104000
1523	00:01:00.143000
1524	00:01:00.183000
1525	00:01:00.222000
1526	00:01:00.262000
1527	00:01:00.301000
1528	00:01:00.341000
1529	00:01:00.380000
1530	00:01:00.420000
1531	00:01:00.459000
1532	00:01:00.499000
1533	00:01:00.538000
1534	00:01:00.578000
1535	00:01:00.617000
1536	00:01:00.657000
1537	00:01:00.696000
1538	00:01:00.736000
1539	00:01:00.775000
1540	00:01:00.815000
1541	00:01:00.854000
1542	00:01:00.894000
1543	00:01:00.933000
1544	00:01:00.973000
1545	00:01:01.012000
1546	00:01:01.052000
1547	00:01:01.091000
1548	00:01:01.131000
1549	00:01:01.170000
1550	00:01:01.210000
1551	00:01:01.249000
1552	00:01:01.289000
1553	00:01:01.328000
1554	00:01:01.368000
1555	00:01:01.408000
1556	00:01:01.447000
1557	00:01:01.487000
1558	00:01:01.526000
1559	00:01:01.566000
1560	00:01:01.605000
1561	00:01:01.644000
1562	00:01:01.684000
1563	00:01:01.724000
1564	00:01:01.763000
1565	00:01:01.803000
1566	00:01:01.842000
1567	00:01:01.882000
1568	00:01:01.921000
1569	00:01:01.961000
1570	00:01:02
1571	00:01:02.040000
1572	00:01:02.079000
1573	00:01:02.119000
1574	00:01:02.158000
1575	00:01:02.198000
1576	00:01:02.237000
1577	00:01:02.277000
1578	00:01:02.316000
1579	00:01:02.356000
1580	00:01:02.395000
1581	00:01:02.435000
1582	00:01:02.474000
1583	00:01:02.514000
1584	00:01:02.553000
1585	00:01:02.593000
1586	00:01:02.632000
1587	00:01:02.672000
1588	00:01:02.711000
1589	00:01:02.751000
1590	00:01:02.790000
1591	00:01:02.830000
1592	00:01:02.870000
1593	00:01:02.909000
1594	00:01:02.948000
1595	00:01:02.988000
1596	00:01:03.027000
1597	00:01:03.067000
1598	00:01:03.106000
1599	00:01:03.146000
1600	00:01:03.186000
1601	00:01:03.225000
1602	00:01:03.265000
1603	00:01:03.304000
1604	00:01:03.344000
1605	00:01:03.383000
1606	00:01:03.423000
1607	00:01:03.462000
1608	00:01:03.502000
1609	00:01:03.541000
1610	00:01:03.581000
1611	00:01:03.620000
1612	00:01:03.660000
1613	00:01:03.699000
1614	00:01:03.739000
1615	00:01:03.778000
1616	00:01:03.818000
1617	00:01:03.857000
1618	00:01:03.897000
1619	00:01:03.936000
1620	00:01:03.976000
1621	00:01:04.015000
1622	00:01:04.055000
1623	00:01:04.094000
1624	00:01:04.134000
1625	00:01:04.173000
1626	00:01:04.213000
1627	00:01:04.252000
1628	00:01:04.292000
1629	00:01:04.331000
1630	00:01:04.371000
1631	00:01:04.410000
1632	00:01:04.450000
1633	00:01:04.489000
1634	00:01:04.529000
1635	00:01:04.568000
1636	00:01:04.608000
1637	00:01:04.647000
1638	00:01:04.687000
1639	00:01:04.727000
1640	00:01:04.766000
1641	00:01:04.806000
1642	00:01:04.845000
1643	00:01:04.885000
1644	00:01:04.924000
1645	00:01:04.964000
1646	00:01:05.003000
1647	00:01:05.044000
1648	00:01:05.083000
1649	00:01:05.123000
1650	00:01:05.162000
1651	00:01:05.202000
1652	00:01:05.241000
1653	00:01:05.281000
1654	00:01:05.320000
1655	00:01:05.360000
1656	00:01:05.399000
1657	00:01:05.439000
1658	00:01:05.478000
1659	00:01:05.518000
1660	00:01:05.557000
1661	00:01:05.597000
1662	00:01:05.636000
1663	00:01:05.676000
1664	00:01:05.715000
1665	00:01:05.755000
1666	00:01:05.794000
1667	00:01:05.834000
1668	00:01:05.873000
1669	00:01:05.913000
1670	00:01:05.952000
1671	00:01:05.992000
1672	00:01:06.031000
1673	00:01:06.071000
1674	00:01:06.110000
1675	00:01:06.150000
1676	00:01:06.189000
1677	00:01:06.229000
1678	00:01:06.269000
1679	00:01:06.308000
1680	00:01:06.348000
1681	00:01:06.387000
1682	00:01:06.427000
1683	00:01:06.466000
1684	00:01:06.506000
1685	00:01:06.545000
1686	00:01:06.585000
1687	00:01:06.624000
1688	00:01:06.664000
1689	00:01:06.703000
1690	00:01:06.743000
1691	00:01:06.782000
1692	00:01:06.822000
1693	00:01:06.861000
1694	00:01:06.901000
1695	00:01:06.940000
1696	00:01:06.980000
1697	00:01:07.019000
1698	00:01:07.059000
1699	00:01:07.098000
1700	00:01:07.138000
1701	00:01:07.177000
1702	00:01:07.217000
1703	00:01:07.256000
1704	00:01:07.296000
1705	00:01:07.335000
1706	00:01:07.375000
1707	00:01:07.414000
1708	00:01:07.454000
1709	00:01:07.493000
1710	00:01:07.533000
1711	00:01:07.572000
1712	00:01:07.612000
1713	00:01:07.651000
1714	00:01:07.691000
1715	00:01:07.730000
1716	00:01:07.770000
1717	00:01:07.809000
1718	00:01:07.849000
1719	00:01:07.888000
1720	00:01:07.928000
1721	00:01:07.967000
1722	00:01:08.007000
1723	00:01:08.047000
1724	00:01:08.086000
1725	00:01:08.126000
1726	00:01:08.165000
1727	00:01:08.205000
1728	00:01:08.244000
1729	00:01:08.284000
1730	00:01:08.323000
1731	00:01:08.363000
1732	00:01:08.402000
1733	00:01:08.442000
1734	00:01:08.481000
1735	00:01:08.521000
1736	00:01:08.560000
1737	00:01:08.600000
1738	00:01:08.639000
1739	00:01:08.679000
1740	00:01:08.718000
1741	00:01:08.758000
1742	00:01:08.797000
1743	00:01:08.837000
1744	00:01:08.876000
1745	00:01:08.916000
1746	00:01:08.955000
1747	00:01:08.995000
1748	00:01:09.034000
1749	00:01:09.074000
1750	00:01:09.113000
1751	00:01:09.153000
1752	00:01:09.192000
1753	00:01:09.232000
1754	00:01:09.271000
1755	00:01:09.311000
1756	00:01:09.350000
1757	00:01:09.390000
1758	00:01:09.429000
1759	00:01:09.469000
1760	00:01:09.508000
1761	00:01:09.548000
1762	00:01:09.588000
1763	00:01:09.627000
1764	00:01:09.667000
1765	00:01:09.706000
1766	00:01:09.746000
1767	00:01:09.785000
1768	00:01:09.825000
1769	00:01:09.864000
1770	00:01:09.904000
1771	00:01:09.943000
1772	00:01:09.983000
1773	00:01:10.022000
1774	00:01:10.062000
1775	00:01:10.101000
1776	00:01:10.141000
1777	00:01:10.180000
1778	00:01:10.220000
1779	00:01:10.259000
1780	00:01:10.299000
1781	00:01:10.338000
1782	00:01:10.378000
1783	00:01:10.417000
1784	00:01:10.457000
1785	00:01:10.496000
1786	00:01:10.536000
1787	00:01:10.575000
1788	00:01:10.615000
1789	00:01:10.654000
1790	00:01:10.694000
1791	00:01:10.733000
1792	00:01:10.773000
1793	00:01:10.812000
1794	00:01:10.852000
1795	00:01:10.891000
1796	00:01:10.931000
1797	00:01:10.970000
1798	00:01:11.010000
1799	00:01:11.050000
1800	00:01:11.089000
1801	00:01:11.129000
1802	00:01:11.168000
1803	00:01:11.208000
1804	00:01:11.247000
1805	00:01:11.287000
1806	00:01:11.326000
1807	00:01:11.366000
1808	00:01:11.405000
1809	00:01:11.445000
1810	00:01:11.484000
1811	00:01:11.524000
1812	00:01:11.563000
1813	00:01:11.603000
1814	00:01:11.642000
1815	00:01:11.682000
1816	00:01:11.721000
1817	00:01:11.761000
1818	00:01:11.800000
1819	00:01:11.840000
1820	00:01:11.879000
1821	00:01:11.919000
1822	00:01:11.958000
1823	00:01:11.998000
1824	00:01:12.037000
1825	00:01:12.077000
1826	00:01:12.116000
1827	00:01:12.156000
1828	00:01:12.195000
1829	00:01:12.235000
1830	00:01:12.274000
1831	00:01:12.314000
1832	00:01:12.353000
1833	00:01:12.393000
1834	00:01:12.432000
1835	00:01:12.472000
1836	00:01:12.511000
1837	00:01:12.551000

## Sheet: #4
frame	time	PC	TB	ant isth	mid isth	post isth
53	00:00:02.055000
54	00:00:02.095000
55	00:00:02.134000
56	00:00:02.174000
57	00:00:02.213000
58	00:00:02.253000
59	00:00:02.292000
60	00:00:02.332000
61	00:00:02.371000
62	00:00:02.411000
63	00:00:02.450000
64	00:00:02.490000
65	00:00:02.529000
66	00:00:02.569000
67	00:00:02.608000
68	00:00:02.648000
69	00:00:02.687000
70	00:00:02.727000
71	00:00:02.766000
72	00:00:02.806000
73	00:00:02.845000
74	00:00:02.885000
75	00:00:02.924000
76	00:00:02.964000
77	00:00:03.003000
78	00:00:03.043000
79	00:00:03.082000
80	00:00:03.122000
81	00:00:03.161000
82	00:00:03.201000
83	00:00:03.240000
84	00:00:03.280000
85	00:00:03.319000
86	00:00:03.359000
87	00:00:03.399000
88	00:00:03.438000
89	00:00:03.478000
90	00:00:03.517000
91	00:00:03.557000
92	00:00:03.596000
93	00:00:03.636000
94	00:00:03.675000
95	00:00:03.715000
96	00:00:03.754000
97	00:00:03.794000
98	00:00:03.833000
99	00:00:03.873000
100	00:00:03.912000
101	00:00:03.952000
102	00:00:03.991000
103	00:00:04.031000
104	00:00:04.070000
105	00:00:04.110000
106	00:00:04.149000
107	00:00:04.189000
108	00:00:04.228000
109	00:00:04.268000
110	00:00:04.307000
111	00:00:04.347000
112	00:00:04.386000
113	00:00:04.426000
114	00:00:04.465000
115	00:00:04.505000
116	00:00:04.544000
117	00:00:04.584000
118	00:00:04.623000
119	00:00:04.663000
120	00:00:04.702000
121	00:00:04.742000
122	00:00:04.781000
123	00:00:04.821000
124	00:00:04.860000
125	00:00:04.900000
126	00:00:04.940000
127	00:00:04.979000
128	00:00:05.019000
129	00:00:05.058000
130	00:00:05.098000
131	00:00:05.137000
132	00:00:05.177000
133	00:00:05.216000
134	00:00:05.256000
135	00:00:05.295000
136	00:00:05.335000
137	00:00:05.374000
138	00:00:05.414000
139	00:00:05.453000
140	00:00:05.493000
141	00:00:05.532000
142	00:00:05.572000
143	00:00:05.611000
144	00:00:05.651000
145	00:00:05.690000
146	00:00:05.730000
147	00:00:05.769000
148	00:00:05.809000
149	00:00:05.848000
150	00:00:05.888000
151	00:00:05.927000
152	00:00:05.967000
153	00:00:06.006000
154	00:00:06.046000
155	00:00:06.085000
156	00:00:06.125000
157	00:00:06.164000
158	00:00:06.204000
159	00:00:06.243000
160	00:00:06.283000
161	00:00:06.322000
162	00:00:06.362000
163	00:00:06.402000
164	00:00:06.441000
165	00:00:06.481000
166	00:00:06.520000
167	00:00:06.559000
168	00:00:06.599000
169	00:00:06.639000
170	00:00:06.678000
171	00:00:06.718000
172	00:00:06.757000
173	00:00:06.797000
174	00:00:06.836000
175	00:00:06.876000
176	00:00:06.915000
177	00:00:06.955000
178	00:00:06.994000
179	00:00:07.034000
180	00:00:07.073000
181	00:00:07.113000
182	00:00:07.152000
183	00:00:07.192000
184	00:00:07.231000
185	00:00:07.271000
186	00:00:07.310000
187	00:00:07.350000
188	00:00:07.389000
189	00:00:07.429000
190	00:00:07.468000
191	00:00:07.508000
192	00:00:07.547000
193	00:00:07.587000
194	00:00:07.626000
195	00:00:07.666000
196	00:00:07.705000
197	00:00:07.745000
198	00:00:07.784000
199	00:00:07.824000
200	00:00:07.863000
201	00:00:07.903000
202	00:00:07.942000
203	00:00:07.982000
204	00:00:08.022000
205	00:00:08.061000
206	00:00:08.100000
207	00:00:08.140000
208	00:00:08.179000
209	00:00:08.219000
210	00:00:08.259000
211	00:00:08.298000
212	00:00:08.338000
213	00:00:08.377000
214	00:00:08.417000
215	00:00:08.456000
216	00:00:08.496000
217	00:00:08.535000
218	00:00:08.575000
219	00:00:08.614000
220	00:00:08.654000
221	00:00:08.693000
222	00:00:08.733000
223	00:00:08.772000
224	00:00:08.812000
225	00:00:08.851000
226	00:00:08.891000
227	00:00:08.930000
228	00:00:08.970000
229	00:00:09.009000
230	00:00:09.049000
231	00:00:09.088000
232	00:00:09.128000
233	00:00:09.167000
234	00:00:09.207000
235	00:00:09.246000
236	00:00:09.286000
237	00:00:09.325000
238	00:00:09.365000
239	00:00:09.404000
240	00:00:09.444000
241	00:00:09.483000
242	00:00:09.523000
243	00:00:09.562000
244	00:00:09.602000
245	00:00:09.641000
246	00:00:09.681000
247	00:00:09.721000
248	00:00:09.760000
249	00:00:09.800000
250	00:00:09.839000
251	00:00:09.879000
252	00:00:09.918000
253	00:00:09.958000
254	00:00:09.997000
255	00:00:10.037000
256	00:00:10.076000
257	00:00:10.116000
258	00:00:10.155000
259	00:00:10.195000
260	00:00:10.234000
261	00:00:10.274000
262	00:00:10.313000
263	00:00:10.353000
264	00:00:10.392000
265	00:00:10.432000
266	00:00:10.471000
267	00:00:10.511000
268	00:00:10.550000
269	00:00:10.590000
270	00:00:10.629000
271	00:00:10.669000
272	00:00:10.708000
273	00:00:10.748000
274	00:00:10.787000
275	00:00:10.827000
276	00:00:10.866000
277	00:00:10.906000
278	00:00:10.945000
279	00:00:10.985000
280	00:00:11.024000
281	00:00:11.064000
282	00:00:11.103000
283	00:00:11.143000
284	00:00:11.182000
285	00:00:11.223000
286	00:00:11.263000
287	00:00:11.302000
288	00:00:11.342000
289	00:00:11.381000
290	00:00:11.420000
291	00:00:11.460000
292	00:00:11.499000
293	00:00:11.539000
294	00:00:11.579000
295	00:00:11.618000
296	00:00:11.658000
297	00:00:11.697000
298	00:00:11.737000
299	00:00:11.776000
300	00:00:11.816000
301	00:00:11.855000
302	00:00:11.895000
303	00:00:11.934000
304	00:00:11.974000
305	00:00:12.013000
306	00:00:12.053000
307	00:00:12.092000
308	00:00:12.132000
309	00:00:12.171000
310	00:00:12.211000
311	00:00:12.250000
312	00:00:12.290000
313	00:00:12.329000
314	00:00:12.369000
315	00:00:12.408000
316	00:00:12.448000
317	00:00:12.487000
318	00:00:12.527000
319	00:00:12.566000
320	00:00:12.606000
321	00:00:12.645000
322	00:00:12.685000
323	00:00:12.724000
324	00:00:12.764000
325	00:00:12.803000
326	00:00:12.843000
327	00:00:12.882000
328	00:00:12.922000
329	00:00:12.961000
330	00:00:13.001000
331	00:00:13.040000
332	00:00:13.080000
333	00:00:13.120000
334	00:00:13.159000
335	00:00:13.199000
336	00:00:13.238000
337	00:00:13.278000
338	00:00:13.317000
339	00:00:13.357000
340	00:00:13.396000
341	00:00:13.436000
342	00:00:13.475000
343	00:00:13.515000
344	00:00:13.554000
345	00:00:13.594000
346	00:00:13.633000
347	00:00:13.673000
348	00:00:13.712000
349	00:00:13.752000
350	00:00:13.791000
351	00:00:13.831000
352	00:00:13.870000
353	00:00:13.910000
354	00:00:13.949000
355	00:00:13.989000
356	00:00:14.028000
357	00:00:14.068000
358	00:00:14.107000
359	00:00:14.147000
360	00:00:14.186000
361	00:00:14.226000
362	00:00:14.265000
363	00:00:14.305000
364	00:00:14.344000
365	00:00:14.384000
366	00:00:14.423000
367	00:00:14.463000
368	00:00:14.502000
369	00:00:14.542000
370	00:00:14.582000
371	00:00:14.621000
372	00:00:14.661000
373	00:00:14.700000
374	00:00:14.740000
375	00:00:14.779000
376	00:00:14.819000
377	00:00:14.858000
378	00:00:14.898000
379	00:00:14.937000
380	00:00:14.977000
381	00:00:15.016000
382	00:00:15.056000
383	00:00:15.095000
384	00:00:15.135000
385	00:00:15.174000
386	00:00:15.214000
387	00:00:15.253000
388	00:00:15.293000
389	00:00:15.332000
390	00:00:15.372000
391	00:00:15.411000
392	00:00:15.451000
393	00:00:15.490000
394	00:00:15.530000
395	00:00:15.569000
396	00:00:15.609000
397	00:00:15.648000
398	00:00:15.688000
399	00:00:15.727000
400	00:00:15.767000
401	00:00:15.806000
402	00:00:15.846000
403	00:00:15.885000
404	00:00:15.925000
405	00:00:15.964000
406	00:00:16.004000
407	00:00:16.043000
408	00:00:16.083000
409	00:00:16.123000
410	00:00:16.162000
411	00:00:16.202000
412	00:00:16.241000
413	00:00:16.281000
414	00:00:16.320000
415	00:00:16.359000
416	00:00:16.399000
417	00:00:16.439000
418	00:00:16.478000
419	00:00:16.518000
420	00:00:16.557000
421	00:00:16.597000
422	00:00:16.636000
423	00:00:16.676000
424	00:00:16.715000
425	00:00:16.755000
426	00:00:16.794000
427	00:00:16.834000
428	00:00:16.873000
429	00:00:16.913000
430	00:00:16.952000
431	00:00:16.992000
432	00:00:17.031000
433	00:00:17.071000
434	00:00:17.110000
435	00:00:17.150000
436	00:00:17.189000
437	00:00:17.229000
438	00:00:17.268000
439	00:00:17.308000
440	00:00:17.347000
441	00:00:17.387000
442	00:00:17.426000
443	00:00:17.466000
444	00:00:17.505000
445	00:00:17.545000
446	00:00:17.584000
447	00:00:17.624000
448	00:00:17.663000
449	00:00:17.703000
450	00:00:17.742000
451	00:00:17.782000
452	00:00:17.821000
453	00:00:17.861000
454	00:00:17.901000
455	00:00:17.940000
456	00:00:17.980000
457	00:00:18.019000
458	00:00:18.059000
459	00:00:18.098000
460	00:00:18.138000
461	00:00:18.177000
462	00:00:18.217000
463	00:00:18.256000
464	00:00:18.296000
465	00:00:18.335000
466	00:00:18.375000
467	00:00:18.414000
468	00:00:18.454000
469	00:00:18.493000
470	00:00:18.533000
471	00:00:18.572000
472	00:00:18.612000
473	00:00:18.651000
474	00:00:18.691000
475	00:00:18.730000
476	00:00:18.770000
477	00:00:18.809000
478	00:00:18.849000
479	00:00:18.888000
480	00:00:18.928000
481	00:00:18.967000
482	00:00:19.007000
483	00:00:19.046000
484	00:00:19.086000
485	00:00:19.125000
486	00:00:19.165000
487	00:00:19.204000
488	00:00:19.244000
489	00:00:19.283000
490	00:00:19.323000
491	00:00:19.362000
492	00:00:19.402000
493	00:00:19.442000
494	00:00:19.481000
495	00:00:19.521000
496	00:00:19.560000
497	00:00:19.600000
498	00:00:19.639000
499	00:00:19.679000
500	00:00:19.718000
501	00:00:19.758000
502	00:00:19.797000
503	00:00:19.837000
504	00:00:19.876000
505	00:00:19.916000
506	00:00:19.955000
507	00:00:19.995000
508	00:00:20.034000
509	00:00:20.074000
510	00:00:20.113000
511	00:00:20.153000
512	00:00:20.192000
513	00:00:20.232000
514	00:00:20.271000
515	00:00:20.311000
516	00:00:20.350000
517	00:00:20.390000
518	00:00:20.429000
519	00:00:20.469000
520	00:00:20.508000
521	00:00:20.548000
522	00:00:20.587000
523	00:00:20.627000
524	00:00:20.666000
525	00:00:20.706000
526	00:00:20.745000
527	00:00:20.785000
528	00:00:20.824000
529	00:00:20.864000
530	00:00:20.903000
531	00:00:20.943000
532	00:00:20.983000
533	00:00:21.022000
534	00:00:21.062000
535	00:00:21.101000
536	00:00:21.141000
537	00:00:21.180000
538	00:00:21.221000
539	00:00:21.260000
540	00:00:21.300000
541	00:00:21.339000
542	00:00:21.379000
543	00:00:21.418000
544	00:00:21.458000
545	00:00:21.497000
546	00:00:21.537000
547	00:00:21.576000
548	00:00:21.616000
549	00:00:21.655000
550	00:00:21.695000
551	00:00:21.734000
552	00:00:21.774000
553	00:00:21.813000
554	00:00:21.853000
555	00:00:21.892000
556	00:00:21.932000
557	00:00:21.971000
558	00:00:22.011000
559	00:00:22.050000
560	00:00:22.090000
561	00:00:22.129000
562	00:00:22.169000
563	00:00:22.208000
564	00:00:22.248000
565	00:00:22.287000
566	00:00:22.327000
567	00:00:22.366000
568	00:00:22.406000
569	00:00:22.445000
570	00:00:22.485000
571	00:00:22.525000
572	00:00:22.564000
573	00:00:22.603000
574	00:00:22.643000
575	00:00:22.682000
576	00:00:22.722000
577	00:00:22.762000
578	00:00:22.801000
579	00:00:22.841000
580	00:00:22.880000
581	00:00:22.920000
582	00:00:22.959000
583	00:00:22.999000
584	00:00:23.038000
585	00:00:23.078000
586	00:00:23.117000
587	00:00:23.157000
588	00:00:23.196000
589	00:00:23.236000
590	00:00:23.275000
591	00:00:23.315000
592	00:00:23.354000
593	00:00:23.394000
594	00:00:23.433000
595	00:00:23.473000
596	00:00:23.512000
597	00:00:23.552000
598	00:00:23.591000
599	00:00:23.631000
600	00:00:23.670000
601	00:00:23.710000
602	00:00:23.749000
603	00:00:23.789000
604	00:00:23.828000
605	00:00:23.868000
606	00:00:23.907000
607	00:00:23.947000
608	00:00:23.986000
609	00:00:24.026000
610	00:00:24.065000
611	00:00:24.105000
612	00:00:24.144000
613	00:00:24.184000
614	00:00:24.223000
615	00:00:24.263000
616	00:00:24.303000
617	00:00:24.342000
618	00:00:24.382000
619	00:00:24.421000
620	00:00:24.461000
621	00:00:24.500000
622	00:00:24.540000
623	00:00:24.579000
624	00:00:24.619000
625	00:00:24.658000
626	00:00:24.698000
627	00:00:24.737000
628	00:00:24.777000
629	00:00:24.816000
630	00:00:24.856000
631	00:00:24.895000
632	00:00:24.935000
633	00:00:24.974000
634	00:00:25.014000
635	00:00:25.053000
636	00:00:25.093000
637	00:00:25.132000
638	00:00:25.172000
639	00:00:25.211000
640	00:00:25.251000
641	00:00:25.290000
642	00:00:25.330000
643	00:00:25.369000
644	00:00:25.409000
645	00:00:25.448000
646	00:00:25.488000
647	00:00:25.527000
648	00:00:25.567000
649	00:00:25.606000
650	00:00:25.646000
651	00:00:25.685000
652	00:00:25.725000
653	00:00:25.764000
654	00:00:25.804000
655	00:00:25.844000
656	00:00:25.883000
657	00:00:25.923000
658	00:00:25.962000
659	00:00:26.001000
660	00:00:26.041000
661	00:00:26.081000
662	00:00:26.120000
663	00:00:26.160000
664	00:00:26.199000
665	00:00:26.239000
666	00:00:26.278000
667	00:00:26.318000
668	00:00:26.357000
669	00:00:26.397000
670	00:00:26.436000
671	00:00:26.476000
672	00:00:26.515000
673	00:00:26.555000
674	00:00:26.594000
675	00:00:26.634000
676	00:00:26.673000
677	00:00:26.713000
678	00:00:26.752000
679	00:00:26.792000
680	00:00:26.831000
681	00:00:26.871000
682	00:00:26.910000
683	00:00:26.950000
684	00:00:26.989000
685	00:00:27.029000
686	00:00:27.068000
687	00:00:27.108000
688	00:00:27.147000
689	00:00:27.187000
690	00:00:27.226000
691	00:00:27.266000
692	00:00:27.306000
693	00:00:27.345000
694	00:00:27.384000
695	00:00:27.424000
696	00:00:27.463000
697	00:00:27.503000
698	00:00:27.542000
699	00:00:27.582000
700	00:00:27.622000
701	00:00:27.661000
702	00:00:27.701000
703	00:00:27.740000
704	00:00:27.780000
705	00:00:27.819000
706	00:00:27.859000
707	00:00:27.898000
708	00:00:27.938000
709	00:00:27.977000
710	00:00:28.017000
711	00:00:28.056000
712	00:00:28.096000
713	00:00:28.135000
714	00:00:28.175000
715	00:00:28.214000
716	00:00:28.254000
717	00:00:28.293000
718	00:00:28.333000
719	00:00:28.372000
720	00:00:28.412000
721	00:00:28.451000
722	00:00:28.491000
723	00:00:28.530000
724	00:00:28.570000
725	00:00:28.609000
726	00:00:28.649000
727	00:00:28.688000
728	00:00:28.728000
729	00:00:28.767000
730	00:00:28.807000
731	00:00:28.846000
732	00:00:28.886000
733	00:00:28.925000
734	00:00:28.965000
735	00:00:29.004000
736	00:00:29.044000
737	00:00:29.083000
738	00:00:29.123000
739	00:00:29.163000
740	00:00:29.202000
741	00:00:29.242000
742	00:00:29.281000
743	00:00:29.321000
744	00:00:29.360000
745	00:00:29.400000
746	00:00:29.439000
747	00:00:29.479000
748	00:00:29.518000
749	00:00:29.558000
750	00:00:29.597000
751	00:00:29.637000
752	00:00:29.676000
753	00:00:29.716000
754	00:00:29.755000
755	00:00:29.795000
756	00:00:29.834000
757	00:00:29.874000
758	00:00:29.913000
759	00:00:29.953000
760	00:00:29.992000
761	00:00:30.032000
762	00:00:30.071000
763	00:00:30.111000
764	00:00:30.150000
765	00:00:30.190000
766	00:00:30.229000
767	00:00:30.269000
768	00:00:30.308000
769	00:00:30.348000
770	00:00:30.387000
771	00:00:30.427000
772	00:00:30.466000
773	00:00:30.506000
774	00:00:30.545000
775	00:00:30.585000
776	00:00:30.625000
777	00:00:30.664000
778	00:00:30.704000
779	00:00:30.743000
780	00:00:30.783000
781	00:00:30.822000
782	00:00:30.862000
783	00:00:30.901000
784	00:00:30.941000
785	00:00:30.980000
786	00:00:31.020000
787	00:00:31.059000
788	00:00:31.099000
789	00:00:31.138000
790	00:00:31.178000
791	00:00:31.217000
792	00:00:31.258000
793	00:00:31.297000
794	00:00:31.337000
795	00:00:31.376000
796	00:00:31.416000
797	00:00:31.455000
798	00:00:31.495000
799	00:00:31.534000
800	00:00:31.574000
801	00:00:31.613000
802	00:00:31.653000
803	00:00:31.692000
804	00:00:31.732000
805	00:00:31.771000
806	00:00:31.811000
807	00:00:31.850000
808	00:00:31.890000
809	00:00:31.929000
810	00:00:31.969000
811	00:00:32.008000
812	00:00:32.048000
813	00:00:32.087000
814	00:00:32.127000
815	00:00:32.167000
816	00:00:32.206000
817	00:00:32.245000
818	00:00:32.285000
819	00:00:32.324000
820	00:00:32.364000
821	00:00:32.403000
822	00:00:32.443000
823	00:00:32.483000
824	00:00:32.522000
825	00:00:32.562000
826	00:00:32.601000
827	00:00:32.641000
828	00:00:32.680000
829	00:00:32.720000
830	00:00:32.759000
831	00:00:32.799000
832	00:00:32.838000
833	00:00:32.878000
834	00:00:32.917000
835	00:00:32.957000
836	00:00:32.996000
837	00:00:33.036000
838	00:00:33.075000
839	00:00:33.115000
840	00:00:33.154000
841	00:00:33.194000
842	00:00:33.233000
843	00:00:33.273000
844	00:00:33.312000
845	00:00:33.352000
846	00:00:33.391000
847	00:00:33.431000
848	00:00:33.470000
849	00:00:33.510000
850	00:00:33.549000
851	00:00:33.589000
852	00:00:33.628000
853	00:00:33.668000
854	00:00:33.707000
855	00:00:33.747000
856	00:00:33.786000
857	00:00:33.826000
858	00:00:33.865000
859	00:00:33.905000
860	00:00:33.944000
861	00:00:33.984000
862	00:00:34.024000
863	00:00:34.063000
864	00:00:34.103000
865	00:00:34.142000
866	00:00:34.182000
867	00:00:34.221000
868	00:00:34.261000
869	00:00:34.300000
870	00:00:34.340000
871	00:00:34.379000
872	00:00:34.419000
873	00:00:34.458000
874	00:00:34.498000
875	00:00:34.537000
876	00:00:34.577000
877	00:00:34.616000
878	00:00:34.656000
879	00:00:34.695000
880	00:00:34.735000
881	00:00:34.774000
882	00:00:34.814000
883	00:00:34.853000
884	00:00:34.893000
885	00:00:34.932000
886	00:00:34.972000
887	00:00:35.011000
888	00:00:35.051000
889	00:00:35.090000
890	00:00:35.130000
891	00:00:35.169000
892	00:00:35.209000
893	00:00:35.248000
894	00:00:35.288000
895	00:00:35.327000
896	00:00:35.367000
897	00:00:35.406000
898	00:00:35.446000
899	00:00:35.486000
900	00:00:35.525000
901	00:00:35.565000
902	00:00:35.604000
903	00:00:35.644000
904	00:00:35.683000
905	00:00:35.723000
906	00:00:35.762000
907	00:00:35.802000
908	00:00:35.841000
909	00:00:35.881000
910	00:00:35.920000
911	00:00:35.960000
912	00:00:35.999000
913	00:00:36.039000
914	00:00:36.078000
915	00:00:36.118000
916	00:00:36.157000
917	00:00:36.197000
918	00:00:36.236000
919	00:00:36.276000
920	00:00:36.315000
921	00:00:36.355000
922	00:00:36.394000
923	00:00:36.434000
924	00:00:36.473000
925	00:00:36.513000
926	00:00:36.552000
927	00:00:36.592000
928	00:00:36.631000
929	00:00:36.671000
930	00:00:36.710000
931	00:00:36.750000
932	00:00:36.789000
933	00:00:36.829000
934	00:00:36.868000
935	00:00:36.908000
936	00:00:36.947000
937	00:00:36.987000
938	00:00:37.026000
939	00:00:37.066000
940	00:00:37.105000
941	00:00:37.145000
942	00:00:37.184000
943	00:00:37.224000
944	00:00:37.263000
945	00:00:37.303000
946	00:00:37.343000
947	00:00:37.382000
948	00:00:37.422000
949	00:00:37.461000
950	00:00:37.501000
951	00:00:37.540000
952	00:00:37.580000
953	00:00:37.619000
954	00:00:37.659000
955	00:00:37.698000
956	00:00:37.738000
957	00:00:37.777000
958	00:00:37.817000
959	00:00:37.856000
960	00:00:37.896000
961	00:00:37.935000
962	00:00:37.975000
963	00:00:38.014000
964	00:00:38.054000
965	00:00:38.093000
966	00:00:38.133000
967	00:00:38.172000
968	00:00:38.212000
969	00:00:38.251000
970	00:00:38.291000
971	00:00:38.330000
972	00:00:38.370000
973	00:00:38.409000
974	00:00:38.449000
975	00:00:38.488000
976	00:00:38.528000
977	00:00:38.567000
978	00:00:38.607000
979	00:00:38.646000
980	00:00:38.686000
981	00:00:38.725000
982	00:00:38.765000
983	00:00:38.805000
984	00:00:38.844000
985	00:00:38.884000
986	00:00:38.923000
987	00:00:38.963000
988	00:00:39.002000
989	00:00:39.042000
990	00:00:39.081000
991	00:00:39.121000
992	00:00:39.160000
993	00:00:39.200000
994	00:00:39.239000
995	00:00:39.279000
996	00:00:39.318000
997	00:00:39.358000
998	00:00:39.397000
999	00:00:39.437000
1000	00:00:39.476000
1001	00:00:39.516000
1002	00:00:39.555000
1003	00:00:39.595000
1004	00:00:39.634000
1005	00:00:39.674000
1006	00:00:39.713000
1007	00:00:39.753000
1008	00:00:39.792000
1009	00:00:39.832000
1010	00:00:39.871000
1011	00:00:39.911000
1012	00:00:39.950000
1013	00:00:39.990000
1014	00:00:40.029000
1015	00:00:40.069000
1016	00:00:40.108000
1017	00:00:40.148000
1018	00:00:40.187000
1019	00:00:40.227000
1020	00:00:40.266000
1021	00:00:40.306000
1022	00:00:40.346000
1023	00:00:40.385000
1024	00:00:40.425000
1025	00:00:40.464000
1026	00:00:40.504000
1027	00:00:40.543000
1028	00:00:40.582000
1029	00:00:40.622000
1030	00:00:40.662000
1031	00:00:40.701000
1032	00:00:40.741000
1033	00:00:40.780000
1034	00:00:40.820000
1035	00:00:40.859000
1036	00:00:40.899000
1037	00:00:40.938000
1038	00:00:40.978000
1039	00:00:41.017000
1040	00:00:41.057000
1041	00:00:41.096000
1042	00:00:41.136000
1043	00:00:41.175000
1044	00:00:41.215000
1045	00:00:41.255000
1046	00:00:41.295000
1047	00:00:41.334000
1048	00:00:41.374000
1049	00:00:41.413000
1050	00:00:41.453000
1051	00:00:41.492000
1052	00:00:41.532000
1053	00:00:41.571000
1054	00:00:41.611000
1055	00:00:41.650000
1056	00:00:41.690000
1057	00:00:41.729000
1058	00:00:41.769000
1059	00:00:41.808000
1060	00:00:41.848000
1061	00:00:41.888000
1062	00:00:41.927000
1063	00:00:41.966000
1064	00:00:42.006000
1065	00:00:42.045000
1066	00:00:42.085000
1067	00:00:42.125000
1068	00:00:42.164000
1069	00:00:42.204000
1070	00:00:42.243000
1071	00:00:42.283000
1072	00:00:42.322000
1073	00:00:42.362000
1074	00:00:42.401000
1075	00:00:42.441000
1076	00:00:42.480000
1077	00:00:42.520000
1078	00:00:42.559000

## Sheet: #3
frame	time	PC	TB	ant isth	mid isth	post isth
297	00:00:11.697000
298	00:00:11.737000
299	00:00:11.776000
300	00:00:11.816000
301	00:00:11.855000
302	00:00:11.895000
303	00:00:11.934000
304	00:00:11.974000
305	00:00:12.013000
306	00:00:12.053000
307	00:00:12.092000
308	00:00:12.132000
309	00:00:12.171000
310	00:00:12.211000
311	00:00:12.250000
312	00:00:12.290000
313	00:00:12.330000
314	00:00:12.369000
315	00:00:12.409000
316	00:00:12.448000
317	00:00:12.488000
318	00:00:12.527000
319	00:00:12.567000
320	00:00:12.606000
321	00:00:12.646000
322	00:00:12.685000
323	00:00:12.725000
324	00:00:12.764000
325	00:00:12.804000
326	00:00:12.843000
327	00:00:12.883000
328	00:00:12.922000
329	00:00:12.962000
330	00:00:13.001000
331	00:00:13.041000
332	00:00:13.080000
333	00:00:13.120000
334	00:00:13.159000
335	00:00:13.199000
336	00:00:13.238000
337	00:00:13.278000
338	00:00:13.317000
339	00:00:13.357000
340	00:00:13.396000
341	00:00:13.436000
342	00:00:13.475000
343	00:00:13.515000
344	00:00:13.554000
345	00:00:13.594000
346	00:00:13.633000
347	00:00:13.673000
348	00:00:13.712000
349	00:00:13.752000
350	00:00:13.791000
351	00:00:13.831000
352	00:00:13.871000
353	00:00:13.910000
354	00:00:13.950000
355	00:00:13.989000
356	00:00:14.029000
357	00:00:14.068000
358	00:00:14.107000
359	00:00:14.147000
360	00:00:14.187000
361	00:00:14.226000
362	00:00:14.266000
363	00:00:14.305000
364	00:00:14.345000
365	00:00:14.384000
366	00:00:14.424000
367	00:00:14.463000
368	00:00:14.503000
369	00:00:14.542000
370	00:00:14.582000
371	00:00:14.621000
372	00:00:14.661000
373	00:00:14.700000
374	00:00:14.740000
375	00:00:14.779000
376	00:00:14.819000
377	00:00:14.858000
378	00:00:14.898000
379	00:00:14.937000
380	00:00:14.977000
381	00:00:15.016000
382	00:00:15.056000
383	00:00:15.095000
384	00:00:15.135000
385	00:00:15.174000
386	00:00:15.214000
387	00:00:15.253000
388	00:00:15.293000
389	00:00:15.332000
390	00:00:15.372000
391	00:00:15.411000
392	00:00:15.451000
393	00:00:15.490000
394	00:00:15.530000
395	00:00:15.569000
396	00:00:15.609000
397	00:00:15.648000
398	00:00:15.688000
399	00:00:15.728000
400	00:00:15.767000
401	00:00:15.807000
402	00:00:15.846000
403	00:00:15.886000
404	00:00:15.925000
405	00:00:15.965000
406	00:00:16.004000
407	00:00:16.044000
408	00:00:16.083000
409	00:00:16.123000
410	00:00:16.162000
411	00:00:16.202000
412	00:00:16.241000
413	00:00:16.281000
414	00:00:16.320000
415	00:00:16.360000
416	00:00:16.399000
417	00:00:16.439000
418	00:00:16.478000
419	00:00:16.518000
420	00:00:16.557000
421	00:00:16.597000
422	00:00:16.636000
423	00:00:16.676000
424	00:00:16.715000
425	00:00:16.755000
426	00:00:16.794000
427	00:00:16.834000
428	00:00:16.873000
429	00:00:16.913000
430	00:00:16.952000
431	00:00:16.992000
432	00:00:17.031000
433	00:00:17.071000
434	00:00:17.110000
435	00:00:17.150000
436	00:00:17.190000
437	00:00:17.229000
438	00:00:17.269000
439	00:00:17.308000
440	00:00:17.348000
441	00:00:17.387000
442	00:00:17.427000
443	00:00:17.466000
444	00:00:17.506000
445	00:00:17.545000
446	00:00:17.585000
447	00:00:17.624000
448	00:00:17.664000
449	00:00:17.703000
450	00:00:17.743000
451	00:00:17.782000
452	00:00:17.822000
453	00:00:17.861000
454	00:00:17.901000
455	00:00:17.940000
456	00:00:17.980000
457	00:00:18.019000
458	00:00:18.059000
459	00:00:18.098000
460	00:00:18.138000
461	00:00:18.177000
462	00:00:18.217000
463	00:00:18.256000
464	00:00:18.296000
465	00:00:18.335000
466	00:00:18.375000
467	00:00:18.414000
468	00:00:18.454000
469	00:00:18.493000
470	00:00:18.533000
471	00:00:18.572000
472	00:00:18.612000
473	00:00:18.651000
474	00:00:18.691000
475	00:00:18.731000
476	00:00:18.770000
477	00:00:18.810000
478	00:00:18.849000
479	00:00:18.888000
480	00:00:18.928000
481	00:00:18.967000
482	00:00:19.007000
483	00:00:19.047000
484	00:00:19.086000
485	00:00:19.126000
486	00:00:19.165000
487	00:00:19.205000
488	00:00:19.244000
489	00:00:19.284000
490	00:00:19.323000
491	00:00:19.363000
492	00:00:19.402000
493	00:00:19.442000
494	00:00:19.481000
495	00:00:19.521000
496	00:00:19.560000
497	00:00:19.600000
498	00:00:19.639000
499	00:00:19.679000
500	00:00:19.718000
501	00:00:19.758000
502	00:00:19.797000
503	00:00:19.837000
504	00:00:19.876000
505	00:00:19.916000
506	00:00:19.955000
507	00:00:19.995000
508	00:00:20.034000
509	00:00:20.074000
510	00:00:20.113000
511	00:00:20.153000
512	00:00:20.192000
513	00:00:20.232000
514	00:00:20.271000
515	00:00:20.311000
516	00:00:20.350000
517	00:00:20.390000
518	00:00:20.429000
519	00:00:20.469000
520	00:00:20.509000
521	00:00:20.548000
522	00:00:20.588000
523	00:00:20.627000
524	00:00:20.667000
525	00:00:20.706000
526	00:00:20.746000
527	00:00:20.785000
528	00:00:20.825000
529	00:00:20.864000
530	00:00:20.904000
531	00:00:20.943000
532	00:00:20.983000
533	00:00:21.022000
534	00:00:21.062000
535	00:00:21.101000
536	00:00:21.141000
537	00:00:21.180000
538	00:00:21.220000
539	00:00:21.259000
540	00:00:21.299000
541	00:00:21.338000
542	00:00:21.378000
543	00:00:21.418000
544	00:00:21.458000
545	00:00:21.497000
546	00:00:21.537000
547	00:00:21.576000
548	00:00:21.616000
549	00:00:21.655000
550	00:00:21.695000
551	00:00:21.734000
552	00:00:21.774000
553	00:00:21.813000
554	00:00:21.853000
555	00:00:21.892000
556	00:00:21.932000
557	00:00:21.971000
558	00:00:22.011000
559	00:00:22.051000
560	00:00:22.090000
561	00:00:22.130000
562	00:00:22.169000
563	00:00:22.209000
564	00:00:22.248000
565	00:00:22.288000
566	00:00:22.327000
567	00:00:22.367000
568	00:00:22.406000
569	00:00:22.446000
570	00:00:22.485000
571	00:00:22.525000
572	00:00:22.564000
573	00:00:22.604000
574	00:00:22.643000
575	00:00:22.683000
576	00:00:22.722000
577	00:00:22.762000
578	00:00:22.801000
579	00:00:22.841000
580	00:00:22.880000
581	00:00:22.920000
582	00:00:22.959000
583	00:00:22.999000
584	00:00:23.038000
585	00:00:23.078000
586	00:00:23.117000
587	00:00:23.157000
588	00:00:23.196000
589	00:00:23.236000
590	00:00:23.275000
591	00:00:23.315000
592	00:00:23.354000
593	00:00:23.394000
594	00:00:23.433000
595	00:00:23.473000
596	00:00:23.512000
597	00:00:23.552000
598	00:00:23.592000
599	00:00:23.631000
600	00:00:23.671000
601	00:00:23.710000
602	00:00:23.749000
603	00:00:23.789000
604	00:00:23.829000
605	00:00:23.868000
606	00:00:23.908000
607	00:00:23.947000
608	00:00:23.987000
609	00:00:24.026000
610	00:00:24.066000
611	00:00:24.105000
612	00:00:24.145000
613	00:00:24.184000
614	00:00:24.224000
615	00:00:24.263000
616	00:00:24.303000
617	00:00:24.342000
618	00:00:24.382000
619	00:00:24.421000
620	00:00:24.461000
621	00:00:24.500000
622	00:00:24.540000
623	00:00:24.579000
624	00:00:24.619000
625	00:00:24.658000
626	00:00:24.698000
627	00:00:24.737000
628	00:00:24.777000
629	00:00:24.816000
630	00:00:24.856000
631	00:00:24.895000
632	00:00:24.935000
633	00:00:24.974000
634	00:00:25.014000
635	00:00:25.053000
636	00:00:25.093000
637	00:00:25.132000
638	00:00:25.172000
639	00:00:25.211000
640	00:00:25.251000
641	00:00:25.290000
642	00:00:25.330000
643	00:00:25.370000
644	00:00:25.409000
645	00:00:25.449000
646	00:00:25.488000
647	00:00:25.528000
648	00:00:25.567000
649	00:00:25.607000
650	00:00:25.646000
651	00:00:25.686000
652	00:00:25.725000
653	00:00:25.765000
654	00:00:25.804000
655	00:00:25.844000
656	00:00:25.883000
657	00:00:25.923000
658	00:00:25.962000
659	00:00:26.002000
660	00:00:26.041000
661	00:00:26.081000
662	00:00:26.120000
663	00:00:26.160000
664	00:00:26.199000
665	00:00:26.239000
666	00:00:26.278000
667	00:00:26.318000
668	00:00:26.357000
669	00:00:26.397000
670	00:00:26.436000
671	00:00:26.476000
672	00:00:26.515000
673	00:00:26.555000
674	00:00:26.594000
675	00:00:26.634000
676	00:00:26.673000
677	00:00:26.713000
678	00:00:26.752000
679	00:00:26.792000
680	00:00:26.831000
681	00:00:26.871000
682	00:00:26.911000
683	00:00:26.950000
684	00:00:26.990000
685	00:00:27.029000
686	00:00:27.069000
687	00:00:27.108000
688	00:00:27.148000
689	00:00:27.187000
690	00:00:27.227000
691	00:00:27.266000
692	00:00:27.306000
693	00:00:27.345000
694	00:00:27.385000
695	00:00:27.424000
696	00:00:27.464000
697	00:00:27.503000
698	00:00:27.543000
699	00:00:27.582000
700	00:00:27.622000
701	00:00:27.661000
702	00:00:27.701000
703	00:00:27.740000
704	00:00:27.780000
705	00:00:27.819000
706	00:00:27.859000
707	00:00:27.898000
708	00:00:27.938000
709	00:00:27.977000
710	00:00:28.017000
711	00:00:28.056000
712	00:00:28.096000
713	00:00:28.135000
714	00:00:28.175000
715	00:00:28.214000
716	00:00:28.254000
717	00:00:28.293000
718	00:00:28.333000
719	00:00:28.372000
720	00:00:28.412000
721	00:00:28.452000
722	00:00:28.491000
723	00:00:28.531000
724	00:00:28.570000
725	00:00:28.610000
726	00:00:28.649000
727	00:00:28.689000
728	00:00:28.728000
729	00:00:28.768000
730	00:00:28.807000
731	00:00:28.847000
732	00:00:28.886000
733	00:00:28.926000
734	00:00:28.965000
735	00:00:29.005000
736	00:00:29.044000
737	00:00:29.084000
738	00:00:29.123000
739	00:00:29.163000
740	00:00:29.202000
741	00:00:29.242000
742	00:00:29.281000
743	00:00:29.321000
744	00:00:29.360000
745	00:00:29.400000
746	00:00:29.439000
747	00:00:29.479000
748	00:00:29.518000
749	00:00:29.558000
750	00:00:29.597000
751	00:00:29.637000
752	00:00:29.676000
753	00:00:29.716000
754	00:00:29.755000
755	00:00:29.795000
756	00:00:29.834000
757	00:00:29.874000
758	00:00:29.914000
759	00:00:29.953000
760	00:00:29.992000
761	00:00:30.032000
762	00:00:30.071000
763	00:00:30.111000
764	00:00:30.150000
765	00:00:30.190000
766	00:00:30.230000
767	00:00:30.269000
768	00:00:30.309000
769	00:00:30.348000
770	00:00:30.388000
771	00:00:30.427000
772	00:00:30.467000
773	00:00:30.506000
774	00:00:30.546000
775	00:00:30.585000
776	00:00:30.625000
777	00:00:30.664000
778	00:00:30.704000
779	00:00:30.743000
780	00:00:30.783000
781	00:00:30.822000
782	00:00:30.862000
783	00:00:30.901000
784	00:00:30.941000
785	00:00:30.980000
786	00:00:31.020000
787	00:00:31.059000
788	00:00:31.099000
789	00:00:31.138000
790	00:00:31.178000
791	00:00:31.217000
792	00:00:31.257000
793	00:00:31.296000
794	00:00:31.336000
795	00:00:31.375000
796	00:00:31.415000
797	00:00:31.455000
798	00:00:31.495000
799	00:00:31.534000
800	00:00:31.574000
801	00:00:31.613000
802	00:00:31.653000
803	00:00:31.692000
804	00:00:31.732000
805	00:00:31.772000
806	00:00:31.811000
807	00:00:31.851000
808	00:00:31.890000
809	00:00:31.930000
810	00:00:31.969000
811	00:00:32.009000
812	00:00:32.048000
813	00:00:32.088000
814	00:00:32.127000
815	00:00:32.167000
816	00:00:32.206000
817	00:00:32.246000
818	00:00:32.285000
819	00:00:32.325000
820	00:00:32.364000
821	00:00:32.404000
822	00:00:32.443000
823	00:00:32.483000
824	00:00:32.522000
825	00:00:32.562000
826	00:00:32.601000
827	00:00:32.641000
828	00:00:32.680000
829	00:00:32.720000
830	00:00:32.759000
831	00:00:32.799000
832	00:00:32.838000
833	00:00:32.878000
834	00:00:32.917000
835	00:00:32.957000
836	00:00:32.996000
837	00:00:33.036000
838	00:00:33.075000
839	00:00:33.115000
840	00:00:33.154000
841	00:00:33.194000
842	00:00:33.234000
843	00:00:33.273000
844	00:00:33.313000
845	00:00:33.352000
846	00:00:33.392000
847	00:00:33.431000
848	00:00:33.471000
849	00:00:33.510000
850	00:00:33.550000
851	00:00:33.589000
852	00:00:33.629000
853	00:00:33.668000
854	00:00:33.708000
855	00:00:33.747000
856	00:00:33.787000
857	00:00:33.826000
858	00:00:33.866000
859	00:00:33.905000
860	00:00:33.945000
861	00:00:33.984000
862	00:00:34.024000
863	00:00:34.063000
864	00:00:34.103000
865	00:00:34.142000
866	00:00:34.182000
867	00:00:34.221000
868	00:00:34.261000
869	00:00:34.300000
870	00:00:34.340000
871	00:00:34.379000
872	00:00:34.419000
873	00:00:34.458000
874	00:00:34.498000
875	00:00:34.537000
876	00:00:34.577000
877	00:00:34.616000
878	00:00:34.656000
879	00:00:34.695000
880	00:00:34.735000
881	00:00:34.774000
882	00:00:34.814000
883	00:00:34.853000
884	00:00:34.893000
885	00:00:34.932000
886	00:00:34.972000
887	00:00:35.011000
888	00:00:35.051000
889	00:00:35.091000
890	00:00:35.130000
891	00:00:35.170000
892	00:00:35.209000
893	00:00:35.249000
894	00:00:35.288000
895	00:00:35.328000
896	00:00:35.367000
897	00:00:35.407000
898	00:00:35.446000
899	00:00:35.486000
900	00:00:35.525000
901	00:00:35.565000
902	00:00:35.604000
903	00:00:35.644000
904	00:00:35.683000
905	00:00:35.723000
906	00:00:35.762000
907	00:00:35.802000
908	00:00:35.841000
909	00:00:35.881000
910	00:00:35.920000
911	00:00:35.960000
912	00:00:35.999000
913	00:00:36.039000
914	00:00:36.078000
915	00:00:36.118000
916	00:00:36.157000
917	00:00:36.197000
918	00:00:36.236000
919	00:00:36.276000
920	00:00:36.315000
921	00:00:36.355000
922	00:00:36.394000
923	00:00:36.434000
924	00:00:36.473000
925	00:00:36.513000
926	00:00:36.552000
927	00:00:36.592000
928	00:00:36.632000
929	00:00:36.671000
930	00:00:36.711000
931	00:00:36.750000
932	00:00:36.790000
933	00:00:36.829000
934	00:00:36.869000
935	00:00:36.908000
936	00:00:36.948000
937	00:00:36.987000
938	00:00:37.027000
939	00:00:37.066000
940	00:00:37.106000
941	00:00:37.145000
942	00:00:37.185000
943	00:00:37.224000
944	00:00:37.264000
945	00:00:37.303000
946	00:00:37.343000
947	00:00:37.382000
948	00:00:37.422000
949	00:00:37.461000
950	00:00:37.501000
951	00:00:37.540000
952	00:00:37.580000
953	00:00:37.619000
954	00:00:37.659000
955	00:00:37.698000
956	00:00:37.738000
957	00:00:37.777000
958	00:00:37.817000
959	00:00:37.856000
960	00:00:37.896000
961	00:00:37.935000
962	00:00:37.975000
963	00:00:38.014000
964	00:00:38.054000
965	00:00:38.094000
966	00:00:38.133000
967	00:00:38.173000
968	00:00:38.212000
969	00:00:38.252000
970	00:00:38.291000
971	00:00:38.330000
972	00:00:38.370000
973	00:00:38.410000
974	00:00:38.449000
975	00:00:38.489000
976	00:00:38.528000
977	00:00:38.568000
978	00:00:38.607000
979	00:00:38.647000
980	00:00:38.686000
981	00:00:38.726000
982	00:00:38.765000
983	00:00:38.805000
984	00:00:38.844000
985	00:00:38.884000
986	00:00:38.923000
987	00:00:38.963000
988	00:00:39.002000
989	00:00:39.042000
990	00:00:39.081000
991	00:00:39.121000
992	00:00:39.160000
993	00:00:39.200000
994	00:00:39.239000
995	00:00:39.279000
996	00:00:39.318000
997	00:00:39.358000
998	00:00:39.397000
999	00:00:39.437000
1000	00:00:39.476000
1001	00:00:39.516000
1002	00:00:39.555000
1003	00:00:39.595000
1004	00:00:39.634000
1005	00:00:39.674000
1006	00:00:39.713000
1007	00:00:39.753000
1008	00:00:39.792000
1009	00:00:39.832000
1010	00:00:39.871000
1011	00:00:39.911000
1012	00:00:39.951000
1013	00:00:39.990000
1014	00:00:40.030000
1015	00:00:40.069000
1016	00:00:40.109000
1017	00:00:40.148000
1018	00:00:40.188000
1019	00:00:40.227000
1020	00:00:40.267000
1021	00:00:40.306000
1022	00:00:40.346000
1023	00:00:40.385000
1024	00:00:40.425000
1025	00:00:40.464000
1026	00:00:40.504000
1027	00:00:40.543000
1028	00:00:40.583000
1029	00:00:40.622000
1030	00:00:40.662000
1031	00:00:40.701000
1032	00:00:40.741000
1033	00:00:40.780000
1034	00:00:40.820000
1035	00:00:40.859000
1036	00:00:40.899000
1037	00:00:40.938000
1038	00:00:40.978000
1039	00:00:41.017000
1040	00:00:41.057000
1041	00:00:41.096000
1042	00:00:41.136000
1043	00:00:41.175000
1044	00:00:41.215000
1045	00:00:41.254000
1046	00:00:41.294000
1047	00:00:41.333000
1048	00:00:41.373000
1049	00:00:41.413000
1050	00:00:41.453000
1051	00:00:41.493000
1052	00:00:41.532000
1053	00:00:41.572000
1054	00:00:41.611000
1055	00:00:41.651000
1056	00:00:41.690000
1057	00:00:41.730000
1058	00:00:41.769000
1059	00:00:41.809000
1060	00:00:41.848000
1061	00:00:41.888000
1062	00:00:41.927000
1063	00:00:41.967000
1064	00:00:42.006000
1065	00:00:42.046000
1066	00:00:42.085000
1067	00:00:42.125000
1068	00:00:42.164000
1069	00:00:42.204000
1070	00:00:42.243000
1071	00:00:42.283000
1072	00:00:42.322000
1073	00:00:42.362000
1074	00:00:42.401000
1075	00:00:42.441000
1076	00:00:42.480000
1077	00:00:42.520000
1078	00:00:42.559000
1079	00:00:42.599000
1080	00:00:42.638000
1081	00:00:42.678000
1082	00:00:42.717000
1083	00:00:42.757000
1084	00:00:42.796000
1085	00:00:42.836000
1086	00:00:42.875000
1087	00:00:42.915000
1088	00:00:42.955000
1089	00:00:42.994000
1090	00:00:43.034000
1091	00:00:43.073000
1092	00:00:43.113000
1093	00:00:43.152000
1094	00:00:43.192000
1095	00:00:43.231000
1096	00:00:43.271000
1097	00:00:43.310000
1098	00:00:43.350000
1099	00:00:43.389000
1100	00:00:43.429000
1101	00:00:43.468000
1102	00:00:43.508000
1103	00:00:43.547000
1104	00:00:43.587000
1105	00:00:43.626000
1106	00:00:43.666000
1107	00:00:43.705000
1108	00:00:43.745000
1109	00:00:43.784000
1110	00:00:43.824000
1111	00:00:43.863000
1112	00:00:43.903000
1113	00:00:43.942000
1114	00:00:43.982000
1115	00:00:44.021000
1116	00:00:44.061000
1117	00:00:44.100000
1118	00:00:44.140000
1119	00:00:44.179000
1120	00:00:44.219000
1121	00:00:44.258000
1122	00:00:44.298000
1123	00:00:44.337000
1124	00:00:44.377000
1125	00:00:44.416000
1126	00:00:44.456000
1127	00:00:44.495000
1128	00:00:44.535000
1129	00:00:44.574000
1130	00:00:44.614000
1131	00:00:44.653000
1132	00:00:44.693000
1133	00:00:44.732000
1134	00:00:44.772000
1135	00:00:44.812000
1136	00:00:44.851000
1137	00:00:44.891000
1138	00:00:44.930000
1139	00:00:44.970000
1140	00:00:45.009000
1141	00:00:45.049000
1142	00:00:45.088000
1143	00:00:45.128000
1144	00:00:45.167000
1145	00:00:45.207000
1146	00:00:45.246000
1147	00:00:45.286000
1148	00:00:45.325000
1149	00:00:45.365000
1150	00:00:45.404000
1151	00:00:45.444000
1152	00:00:45.483000
1153	00:00:45.523000
1154	00:00:45.562000
1155	00:00:45.602000
1156	00:00:45.641000
1157	00:00:45.681000
1158	00:00:45.720000
1159	00:00:45.760000
1160	00:00:45.799000
1161	00:00:45.839000
1162	00:00:45.878000
1163	00:00:45.918000
1164	00:00:45.957000
1165	00:00:45.997000
1166	00:00:46.036000
1167	00:00:46.076000
1168	00:00:46.115000
1169	00:00:46.155000
1170	00:00:46.194000
1171	00:00:46.234000
1172	00:00:46.274000
1173	00:00:46.313000
1174	00:00:46.353000
1175	00:00:46.392000
1176	00:00:46.432000
1177	00:00:46.471000
1178	00:00:46.511000
1179	00:00:46.550000
1180	00:00:46.590000
1181	00:00:46.629000
1182	00:00:46.669000
1183	00:00:46.708000
1184	00:00:46.748000
1185	00:00:46.787000
1186	00:00:46.827000
1187	00:00:46.866000
1188	00:00:46.906000
1189	00:00:46.945000
1190	00:00:46.985000
1191	00:00:47.024000
1192	00:00:47.064000
1193	00:00:47.103000
1194	00:00:47.143000
1195	00:00:47.182000
1196	00:00:47.222000
1197	00:00:47.261000
1198	00:00:47.301000
1199	00:00:47.340000
1200	00:00:47.380000
1201	00:00:47.419000
1202	00:00:47.459000
1203	00:00:47.498000
1204	00:00:47.538000
1205	00:00:47.577000
1206	00:00:47.617000
1207	00:00:47.656000
1208	00:00:47.696000
1209	00:00:47.735000
1210	00:00:47.775000
1211	00:00:47.815000
1212	00:00:47.854000
1213	00:00:47.894000
1214	00:00:47.933000
1215	00:00:47.973000
1216	00:00:48.012000
1217	00:00:48.052000
1218	00:00:48.091000
1219	00:00:48.131000
1220	00:00:48.170000
1221	00:00:48.210000
1222	00:00:48.249000
1223	00:00:48.289000
1224	00:00:48.328000
1225	00:00:48.368000
1226	00:00:48.407000
1227	00:00:48.447000
1228	00:00:48.486000
1229	00:00:48.526000
1230	00:00:48.565000
1231	00:00:48.605000
1232	00:00:48.644000
1233	00:00:48.684000
1234	00:00:48.723000
1235	00:00:48.763000
1236	00:00:48.802000
1237	00:00:48.842000
1238	00:00:48.881000
1239	00:00:48.921000
1240	00:00:48.960000
1241	00:00:49
1242	00:00:49.039000
1243	00:00:49.079000
1244	00:00:49.118000
1245	00:00:49.158000
1246	00:00:49.197000
1247	00:00:49.237000
1248	00:00:49.277000
1249	00:00:49.316000
1250	00:00:49.355000
1251	00:00:49.395000
1252	00:00:49.434000
1253	00:00:49.474000
1254	00:00:49.514000
1255	00:00:49.553000
1256	00:00:49.593000
1257	00:00:49.632000
1258	00:00:49.672000
1259	00:00:49.711000
1260	00:00:49.751000
1261	00:00:49.790000
1262	00:00:49.830000
1263	00:00:49.869000
1264	00:00:49.909000
1265	00:00:49.948000
1266	00:00:49.988000
1267	00:00:50.027000
1268	00:00:50.067000
1269	00:00:50.106000
1270	00:00:50.146000
1271	00:00:50.185000
1272	00:00:50.225000
1273	00:00:50.264000
1274	00:00:50.304000
1275	00:00:50.343000
1276	00:00:50.383000
1277	00:00:50.422000
1278	00:00:50.462000
1279	00:00:50.501000
1280	00:00:50.541000
1281	00:00:50.580000
1282	00:00:50.620000
1283	00:00:50.659000
1284	00:00:50.699000
1285	00:00:50.738000
1286	00:00:50.778000
1287	00:00:50.817000
1288	00:00:50.857000
1289	00:00:50.896000
1290	00:00:50.936000
1291	00:00:50.975000
1292	00:00:51.015000
1293	00:00:51.054000
1294	00:00:51.094000
1295	00:00:51.134000
1296	00:00:51.173000
1297	00:00:51.213000
1298	00:00:51.252000
1299	00:00:51.292000
1300	00:00:51.331000
1301	00:00:51.371000
1302	00:00:51.410000
1303	00:00:51.451000
1304	00:00:51.490000
1305	00:00:51.530000
1306	00:00:51.569000
1307	00:00:51.609000
1308	00:00:51.648000
1309	00:00:51.688000
1310	00:00:51.727000
1311	00:00:51.767000
1312	00:00:51.806000
1313	00:00:51.846000
1314	00:00:51.885000
1315	00:00:51.925000
1316	00:00:51.964000
1317	00:00:52.004000
1318	00:00:52.043000
1319	00:00:52.083000
1320	00:00:52.122000
1321	00:00:52.162000
1322	00:00:52.201000
1323	00:00:52.241000
1324	00:00:52.280000
1325	00:00:52.320000
1326	00:00:52.359000
1327	00:00:52.399000
1328	00:00:52.438000
1329	00:00:52.478000
1330	00:00:52.517000
1331	00:00:52.557000
1332	00:00:52.596000
1333	00:00:52.636000
1334	00:00:52.676000
1335	00:00:52.715000
1336	00:00:52.755000
1337	00:00:52.794000
1338	00:00:52.834000
1339	00:00:52.873000
1340	00:00:52.913000
1341	00:00:52.952000
1342	00:00:52.992000
1343	00:00:53.031000
1344	00:00:53.071000
1345	00:00:53.110000
1346	00:00:53.150000
1347	00:00:53.189000
1348	00:00:53.229000
1349	00:00:53.268000
1350	00:00:53.308000
1351	00:00:53.347000
1352	00:00:53.387000
1353	00:00:53.426000
1354	00:00:53.466000
1355	00:00:53.505000
1356	00:00:53.545000
1357	00:00:53.584000
1358	00:00:53.624000
1359	00:00:53.663000
1360	00:00:53.703000
1361	00:00:53.742000
1362	00:00:53.782000
1363	00:00:53.821000
1364	00:00:53.861000
1365	00:00:53.900000
1366	00:00:53.940000
1367	00:00:53.979000
1368	00:00:54.019000
1369	00:00:54.058000
1370	00:00:54.098000
1371	00:00:54.138000
1372	00:00:54.177000
1373	00:00:54.216000
1374	00:00:54.256000
1375	00:00:54.295000
1376	00:00:54.335000
1377	00:00:54.374000
1378	00:00:54.414000
1379	00:00:54.454000
1380	00:00:54.493000
1381	00:00:54.533000
1382	00:00:54.572000
1383	00:00:54.612000
1384	00:00:54.651000
1385	00:00:54.691000
1386	00:00:54.730000
1387	00:00:54.770000
1388	00:00:54.809000
1389	00:00:54.849000
1390	00:00:54.888000
1391	00:00:54.928000
1392	00:00:54.967000
1393	00:00:55.007000
1394	00:00:55.046000
1395	00:00:55.086000
1396	00:00:55.125000
1397	00:00:55.165000
1398	00:00:55.204000
1399	00:00:55.244000
1400	00:00:55.283000
1401	00:00:55.323000
1402	00:00:55.362000
1403	00:00:55.402000
1404	00:00:55.441000
1405	00:00:55.481000
1406	00:00:55.520000
1407	00:00:55.560000
1408	00:00:55.599000
1409	00:00:55.639000
1410	00:00:55.678000
1411	00:00:55.718000
1412	00:00:55.757000
1413	00:00:55.797000
1414	00:00:55.836000
1415	00:00:55.876000
1416	00:00:55.915000
1417	00:00:55.955000
1418	00:00:55.995000
1419	00:00:56.034000
1420	00:00:56.074000
1421	00:00:56.113000
1422	00:00:56.153000
1423	00:00:56.192000
1424	00:00:56.232000
1425	00:00:56.271000
1426	00:00:56.311000
1427	00:00:56.350000
1428	00:00:56.390000
1429	00:00:56.429000
1430	00:00:56.469000
1431	00:00:56.508000
1432	00:00:56.548000
1433	00:00:56.587000
1434	00:00:56.627000
1435	00:00:56.666000
1436	00:00:56.706000
1437	00:00:56.745000
1438	00:00:56.785000
1439	00:00:56.824000
1440	00:00:56.864000
1441	00:00:56.903000
1442	00:00:56.943000
1443	00:00:56.982000
1444	00:00:57.022000
1445	00:00:57.061000
1446	00:00:57.101000
1447	00:00:57.140000
1448	00:00:57.180000
1449	00:00:57.219000
1450	00:00:57.259000
1451	00:00:57.298000
1452	00:00:57.338000
1453	00:00:57.377000
1454	00:00:57.417000
1455	00:00:57.457000
1456	00:00:57.496000
1457	00:00:57.536000
1458	00:00:57.575000
1459	00:00:57.615000
1460	00:00:57.654000
1461	00:00:57.694000
1462	00:00:57.733000
1463	00:00:57.773000
1464	00:00:57.812000
1465	00:00:57.852000
1466	00:00:57.891000
1467	00:00:57.931000
1468	00:00:57.970000
1469	00:00:58.010000
1470	00:00:58.049000
1471	00:00:58.089000
1472	00:00:58.128000
1473	00:00:58.168000
1474	00:00:58.207000
1475	00:00:58.247000
1476	00:00:58.286000
1477	00:00:58.326000
1478	00:00:58.365000
1479	00:00:58.405000
1480	00:00:58.444000
1481	00:00:58.484000
1482	00:00:58.523000
1483	00:00:58.563000
1484	00:00:58.602000
1485	00:00:58.642000
1486	00:00:58.681000
1487	00:00:58.721000
1488	00:00:58.760000
1489	00:00:58.800000
1490	00:00:58.839000
1491	00:00:58.879000
1492	00:00:58.918000
1493	00:00:58.958000
1494	00:00:58.998000
1495	00:00:59.037000
1496	00:00:59.076000
1497	00:00:59.116000
1498	00:00:59.156000
1499	00:00:59.195000
1500	00:00:59.234000
1501	00:00:59.274000
1502	00:00:59.314000
1503	00:00:59.353000
1504	00:00:59.393000
1505	00:00:59.432000
1506	00:00:59.472000
1507	00:00:59.511000
1508	00:00:59.551000
1509	00:00:59.590000
1510	00:00:59.630000
1511	00:00:59.669000
1512	00:00:59.709000
1513	00:00:59.748000
1514	00:00:59.788000
1515	00:00:59.827000
1516	00:00:59.867000
1517	00:00:59.906000
1518	00:00:59.946000
1519	00:00:59.985000
1520	00:01:00.025000
1521	00:01:00.064000
1522	00:01:00.104000
1523	00:01:00.143000
1524	00:01:00.183000
1525	00:01:00.222000
1526	00:01:00.262000
1527	00:01:00.301000
1528	00:01:00.341000
1529	00:01:00.380000
1530	00:01:00.420000
1531	00:01:00.459000
1532	00:01:00.499000
1533	00:01:00.538000
1534	00:01:00.578000
1535	00:01:00.617000
1536	00:01:00.657000
1537	00:01:00.696000
1538	00:01:00.736000
1539	00:01:00.775000
1540	00:01:00.815000
1541	00:01:00.855000
1542	00:01:00.894000
1543	00:01:00.934000
1544	00:01:00.973000
1545	00:01:01.013000
1546	00:01:01.052000
1547	00:01:01.092000
1548	00:01:01.131000
